# Supplementary material for: Identification of four novel associations for B-cell acute lymphoblastic leukaemia risk
Source: PubMed Central journal article supplement (PMC6877561; doi:10.1038/s41467-019-13069-6), 2019-11-25
Supplement: 41467_2019_13069_MOESM2_ESM.pdf [file 41467_2019_13069_MOESM2_ESM.pdf]

1 **Identification of four novel associations for B-cell acute lymphoblastic leukaemia risk**

2 *Vijayakrishnan et al.*

3

4 **Supplementary Information**

5

6

7

8 **Supplementary Figure 1: Overall study scheme.**

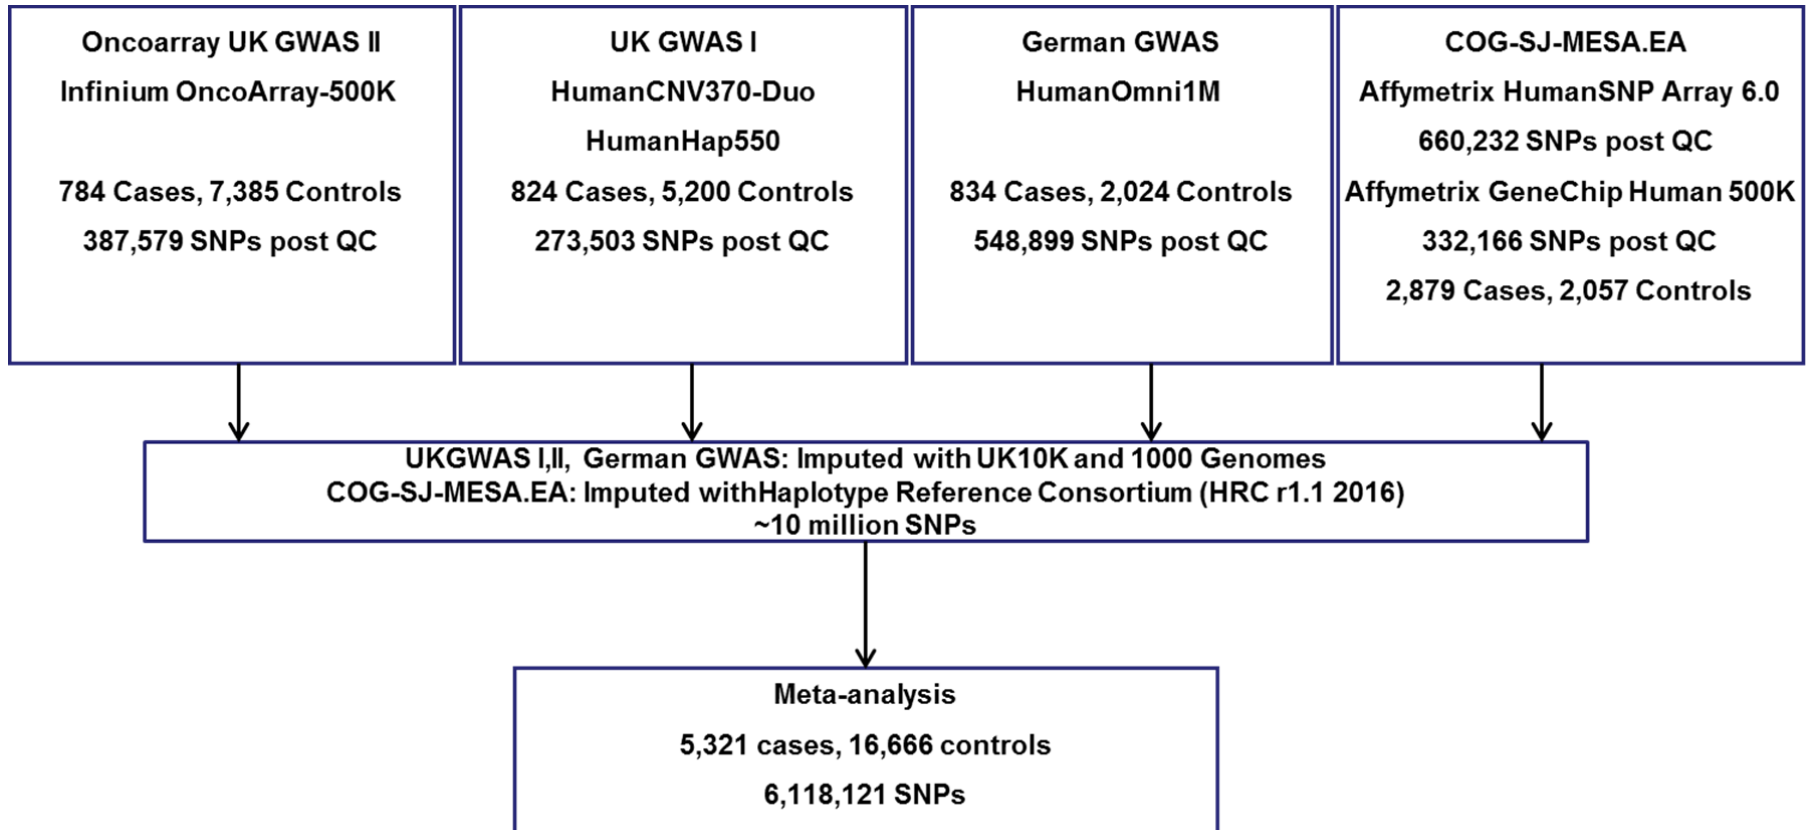

9

10

11

12

13  
14  
15

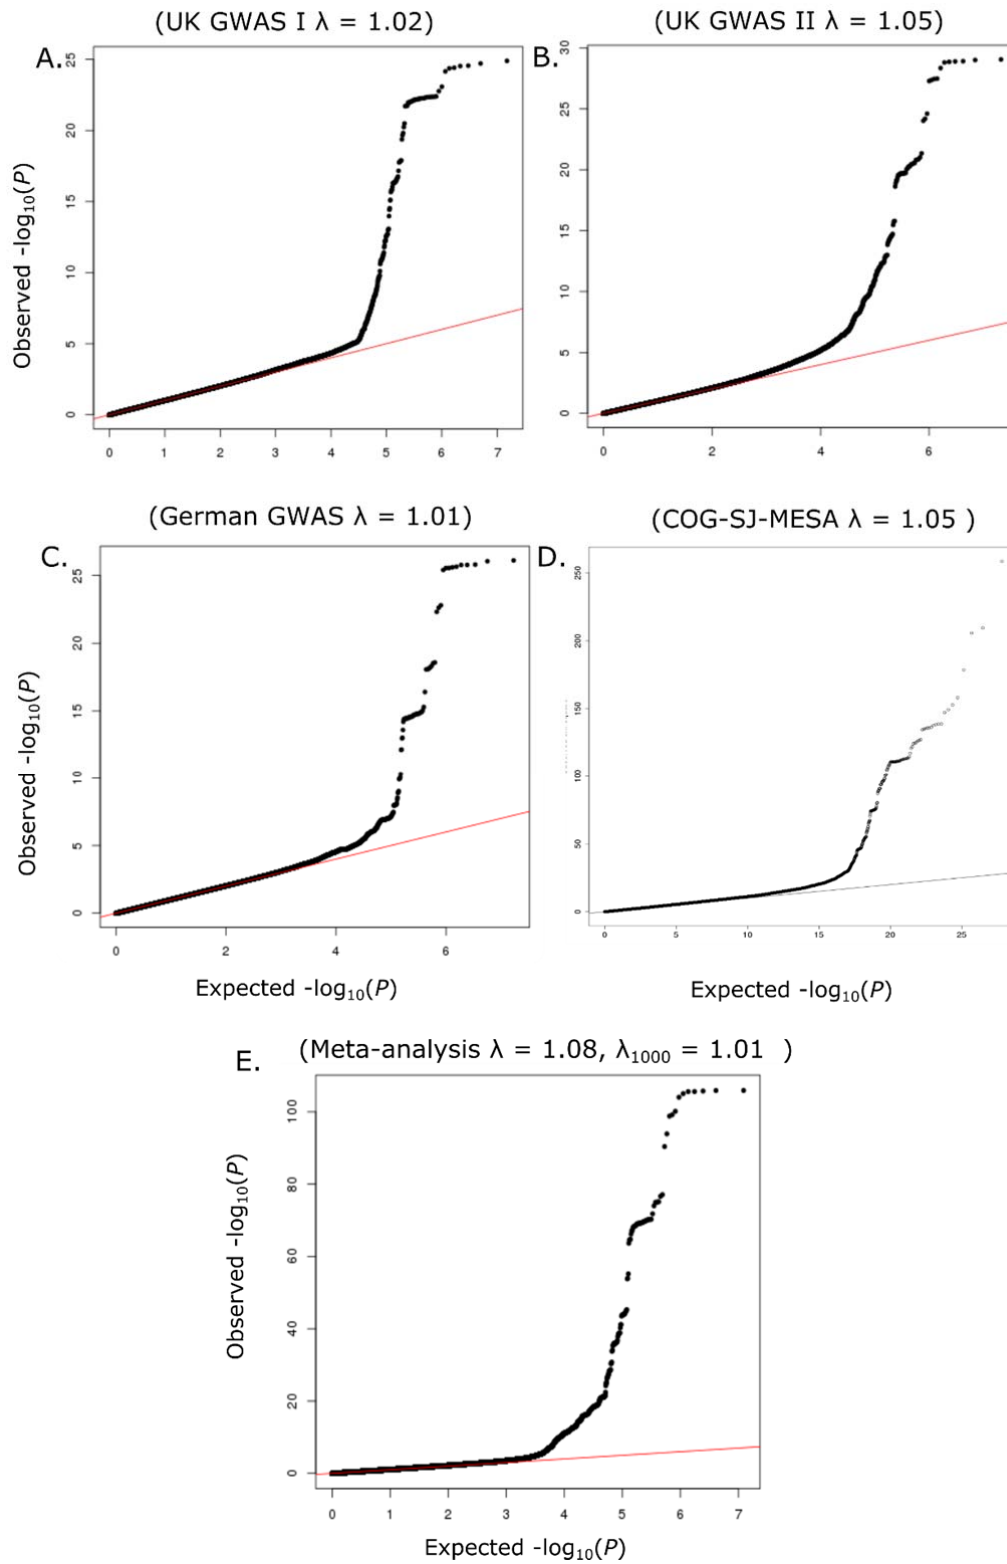

16 **Supplementary Figure 2 : QQ plot post imputation and genomic corrections for (A) UK GWAS I, (B) German GWAS,**  
17 **(C) UK GWAS II, (D)COG-SJ-MESA and (E) Meta-analysis showing  $\lambda$  values.**

18

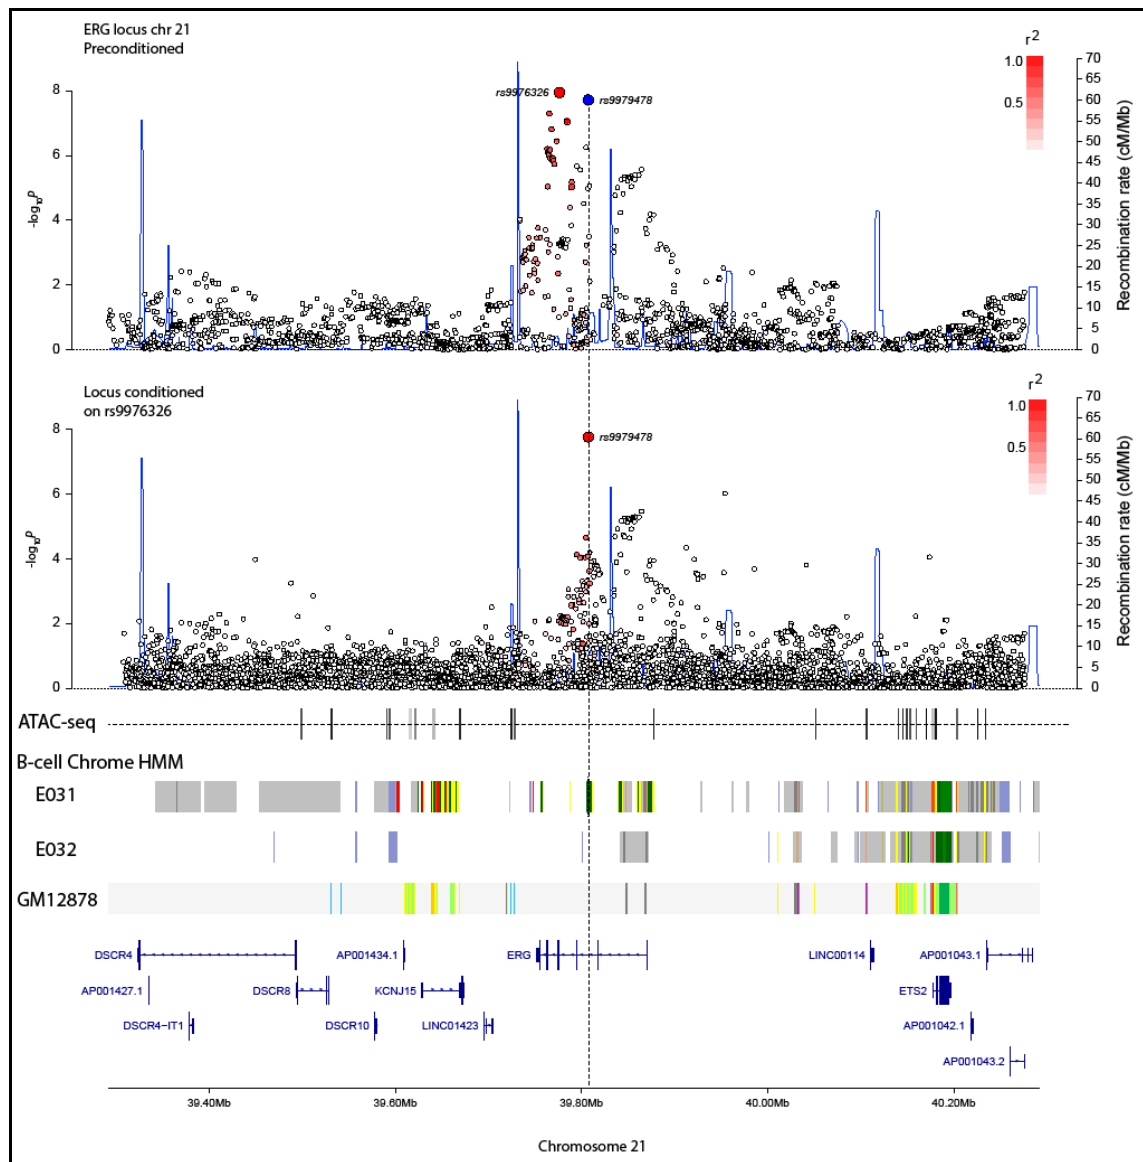20  
21

22 **Supplementary Figure 3: Pre and post conditional analysis association plots with epigenetic**  
 23 **annotation.** Top pane shows the chr21q22 locus prior to GWAS conditioning, and the middle pane  
 24 shows SNP  $P$ -values after adjusting for the lead SNP (rs9976326). SNP shading denotes linkage  
 25 disequilibrium with the lead SNP ( $r^2 = 0$ , white,  $r^2 = 1.0$ , dark red). SNPs (circles) plotted by GWAS  $P$ -  
 26 values ( $-\log_{10}$ , left y-axis) and location (x-axis, GRCh37/hg19). Recombination rate (cM/Mb) on right  
 27 y-axis, shown by light blue line. Lower section; ATAC-seq peaks showing chromatin accessibility,  
 28 shade denotes score. Multicolour bar shows chromatin states in 2 primary (E031 and E032) and one  
 29 B-cell line (GM12878) generated using ChomHMM, see Supplementary Fig 7 for key.

30  
31

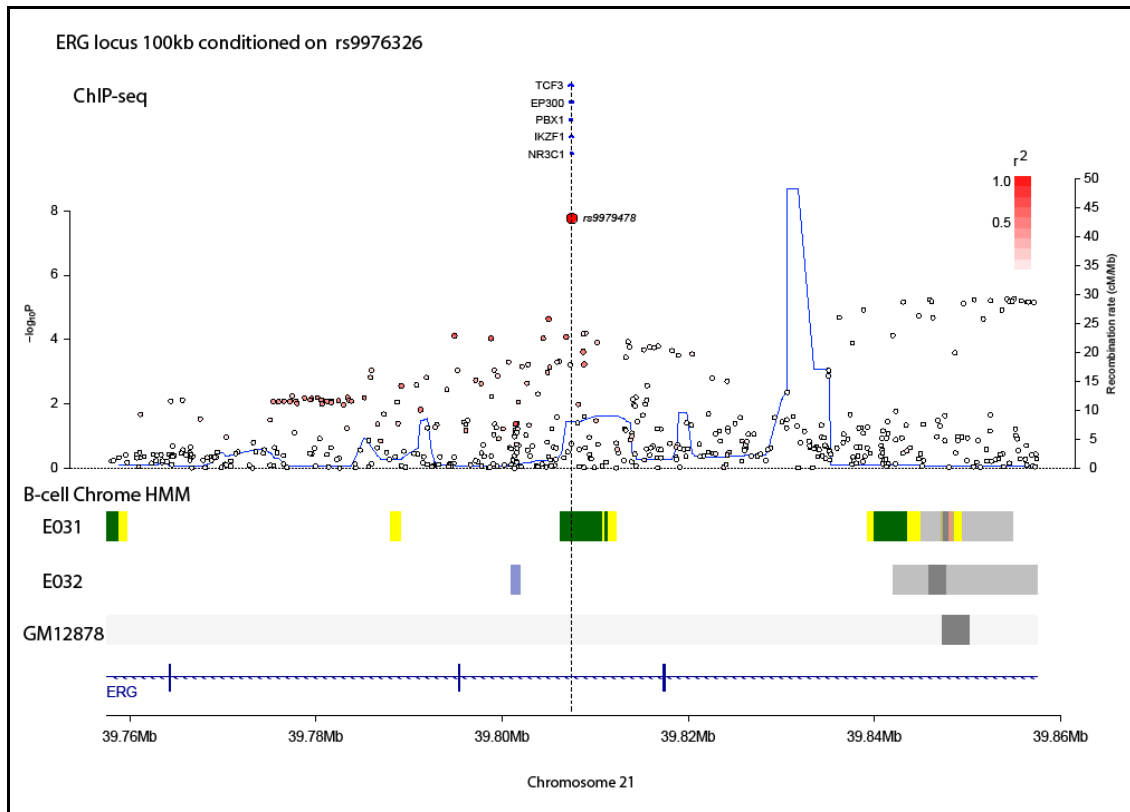

32

33 **Supplementary Figure 4: Regional association plot of 100kb window around the novel post**  
 34 **conditioning SNP rs9975478 at chr21q22. Blue lines denote transcription factor ChIP-seq peaks in**  
 35 **blood cells.**

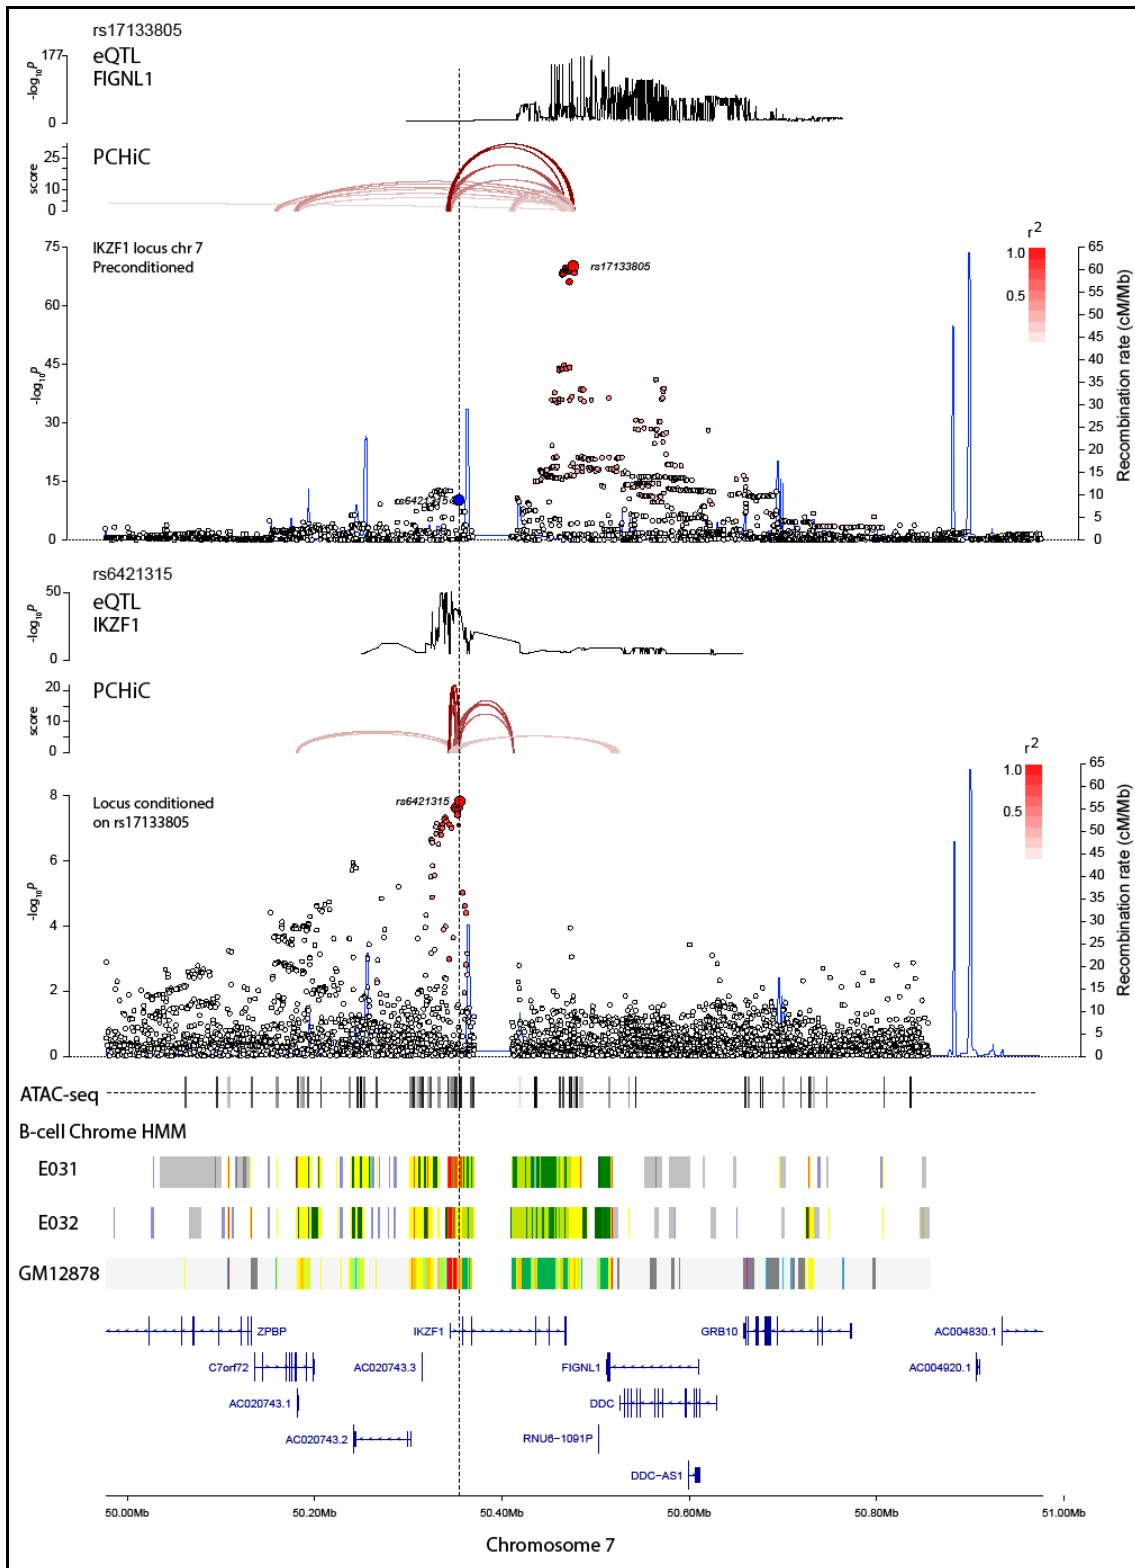

36  
37

38 **Supplementary Figure 5: Pre and post conditional analysis association plots with epigenetic**  
 39 **annotation.** Top pane shows the chr7p12 locus prior to GWAS conditioning, and the middle pane  
 40 shows SNP *P*-values after adjusting for the lead SNP (rs17133805). SNP shading denotes linkage

41 disequilibrium with the lead SNP ( $r^2 = 0$ , white,  $r^2 = 1.0$ , dark red). SNPs (circles) plotted by GWAS  $P$ -  
42 values ( $-\log_{10}$ , left y-axis) and location (x-axis, GRCh37/hg19). Recombination rate (cM/Mb) on right  
43 y-axis, shown by light blue line. EQTLs (black line) and looping promoter capture chromatin  
44 interactions (PCHiC, red arches) are shown for lead SNPs only in both pre and post conditional plots.  
45 Lead SNPs in each locus are defined as any SNP with a  $P$ -value  $< P(\text{min}) \times 50$  and  $R^2 > 0.8$  from the  
46 lead SNP. Lower section; ATAC-seq peaks showing chromatin accessibility, shade denotes score.  
47 Multicolour bar shows chromatin states in 2 primary (E031 and E032) and one B-cell line (GM12878)  
48 generated using ChomHMM, see Supplementary Fig 7 for key. Lower section; ATAC-seq peaks  
49 showing chromatin accessibility, shade denotes score. Multicolour bar shows chromatin states in 2  
50 primary (E031 and E032) and one B-cell line (GM12878) generated using ChomHMM, see Supp Fig 7  
51 for ATAC scale and ChromHMM state definition.

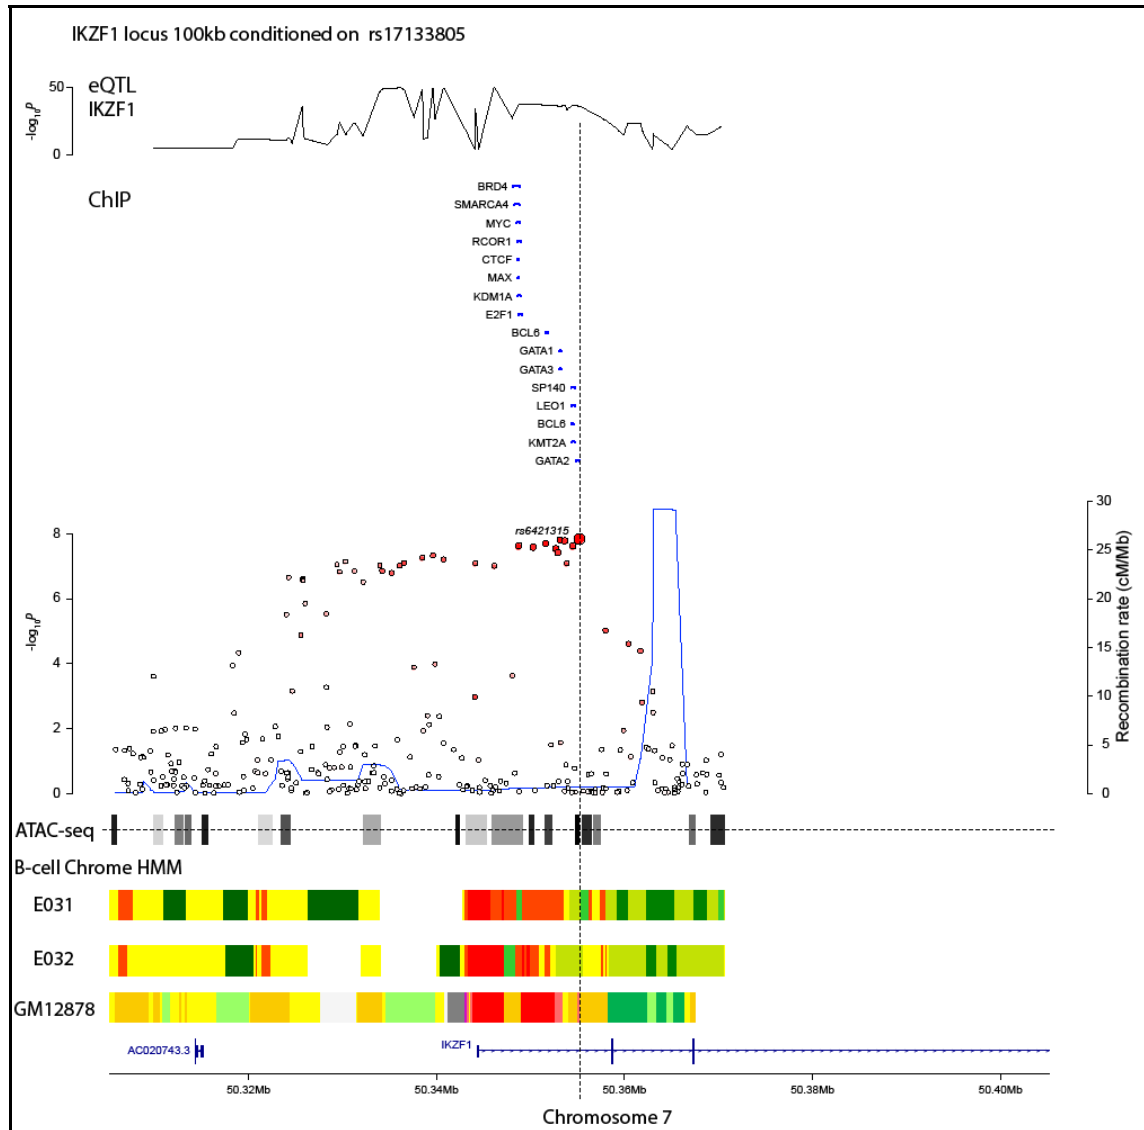53  
54

55 **Supplementary Figure 6: Regional association plot of 100kb window around the novel post**  
 56 **conditioning SNP rs6421315 at chr21q22. Blue lines denote transcription factor ChIP-Seq peaks in**  
 57 **blood cells.**

58



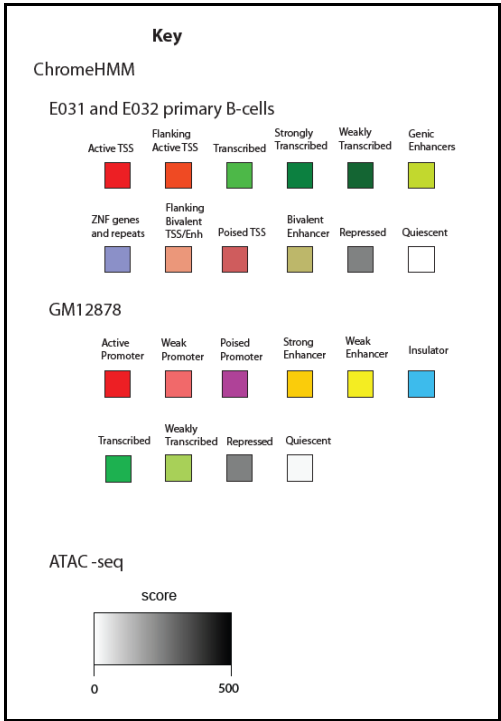

59

60 **Supplementary Figure 7: Key for ATAC-seq and ChromHMM data plotted in Supplementary Figures**  
 61 **3,4,5 and 6.**

62

63

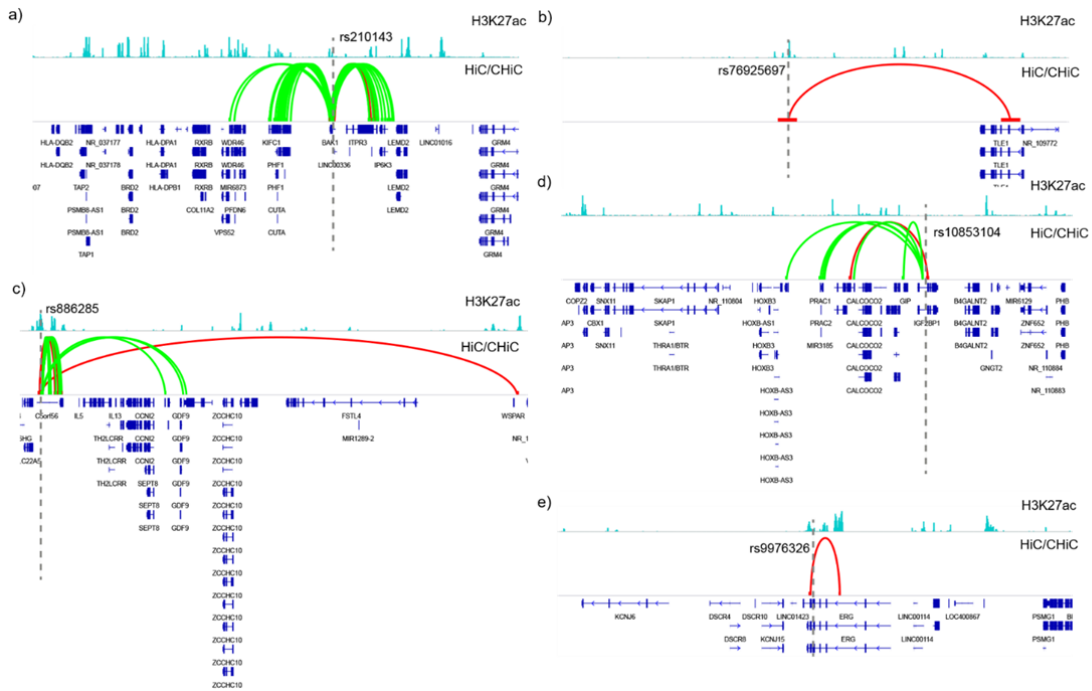

64

65 **Supplementary Figure 8: Chromatin interaction plot of novel risk loci in human ALL cell line Nalm6**

66 **and naive B-cells. (a) for hyperdiploid ALL 6p21.31 (rs210143 in *BAK1*), (b) for B-ALL at 9q21.31**

67 **(rs76925697), (c) for hyperdiploid ALL at 5q31.1 (rs886285), (d) for *ETV6-RUNX1* ALL at 17q21.32**

68 **(rs10853104 in *IGF2BP1*) and (e) for *ERG* ALL at 21q22.2 (rs9976326). Histone acetylation mark**

69 **and chromatin looping signals of Nalm6 were directly downloaded from the NCBI GEO**

70 **GSE115494 dataset as described previously<sup>1</sup>. Loop interactions were call using HiCCUPS<sup>2</sup> from Juicer**

71 **tools v1.12.01 under default parameters at resolution of 5000 and 10000 bp. Enriched interaction**

72 **were reported with a false discovery rate < 0.1. For chromatin looping in Naïve B cells, promoter**

73 **looping interactions were downloaded and filtered for a  $-\log(\text{weighted } P) \geq 5$ , as detrmned by the**

74 **chromatin conformation capture assay (ChIC)<sup>3</sup>. Interactions were called using ChICAGO<sup>4</sup>.**

75 **Interactions overlapping lead SNPs in each locus are reported. ChIC singals from niave B-cells and**

76 **HiC signals from ALL cell line Nalm6 are shown as green and red arches, respectively.**

77

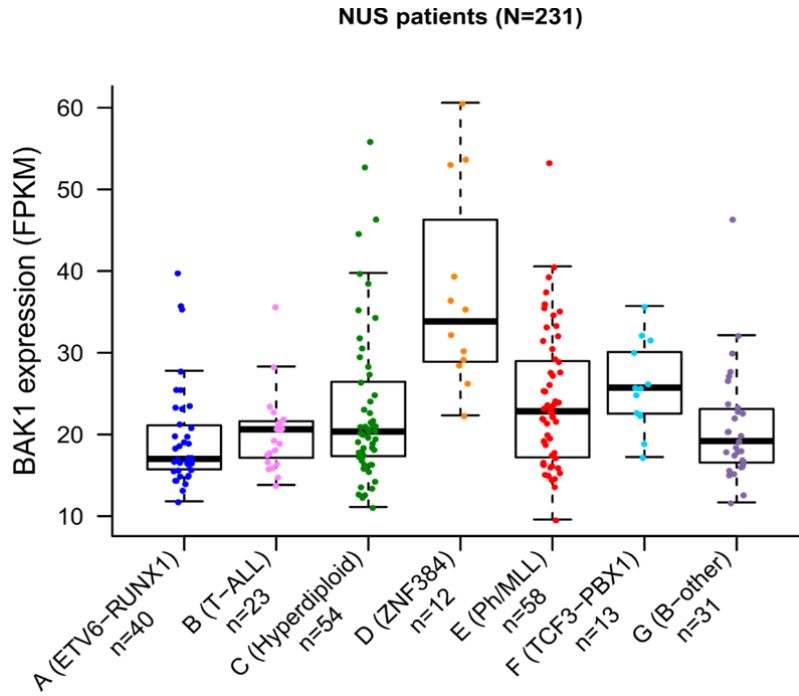

78

79 **Supplementary Figure 9: Expression of the *BAK1* gene in different subgroups of ALL.** There are  
 80 seven different ALL subgroups identified by unsupervised hierarchical clustering of gene expression  
 81 profile from 231 children with newly diagnosed ALL<sup>5</sup>. Each sample is represented by a dot and is  
 82 colour-coded according to the subgroups it belongs to.

83

NUS patients (N=231)

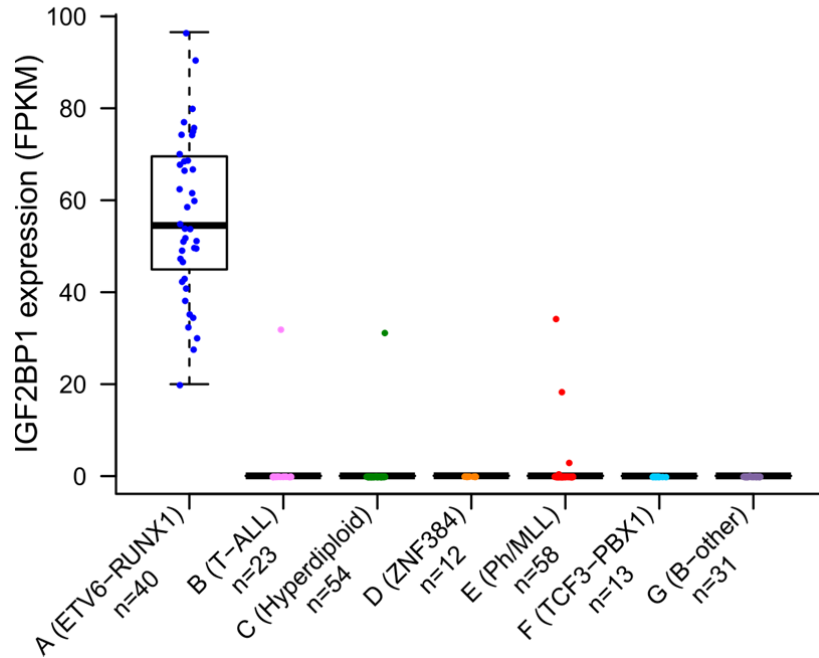

84

85

86 **Supplementary Figure 10: Expression of the *IGF2BP1* gene in different subgroups of ALL.** There  
87 are seven different ALL subgroups identified by unsupervised hierarchical clustering of gene  
88 expression profile from 231 children with newly diagnosed ALL<sup>5</sup>. Each sample is represented by a dot  
89 and is colour-coded according to the subgroups it belongs to. *ETV6-RUNX1* positive ALL cells showed  
90 significant overexpression of *IGF2BP1* compared to other ALL subtypes ( $P = 3.68 \times 10^{-23}$ , by two-sided  
91 Wilcoxon rank sum test).

92

93

94

95

96

97

98

99

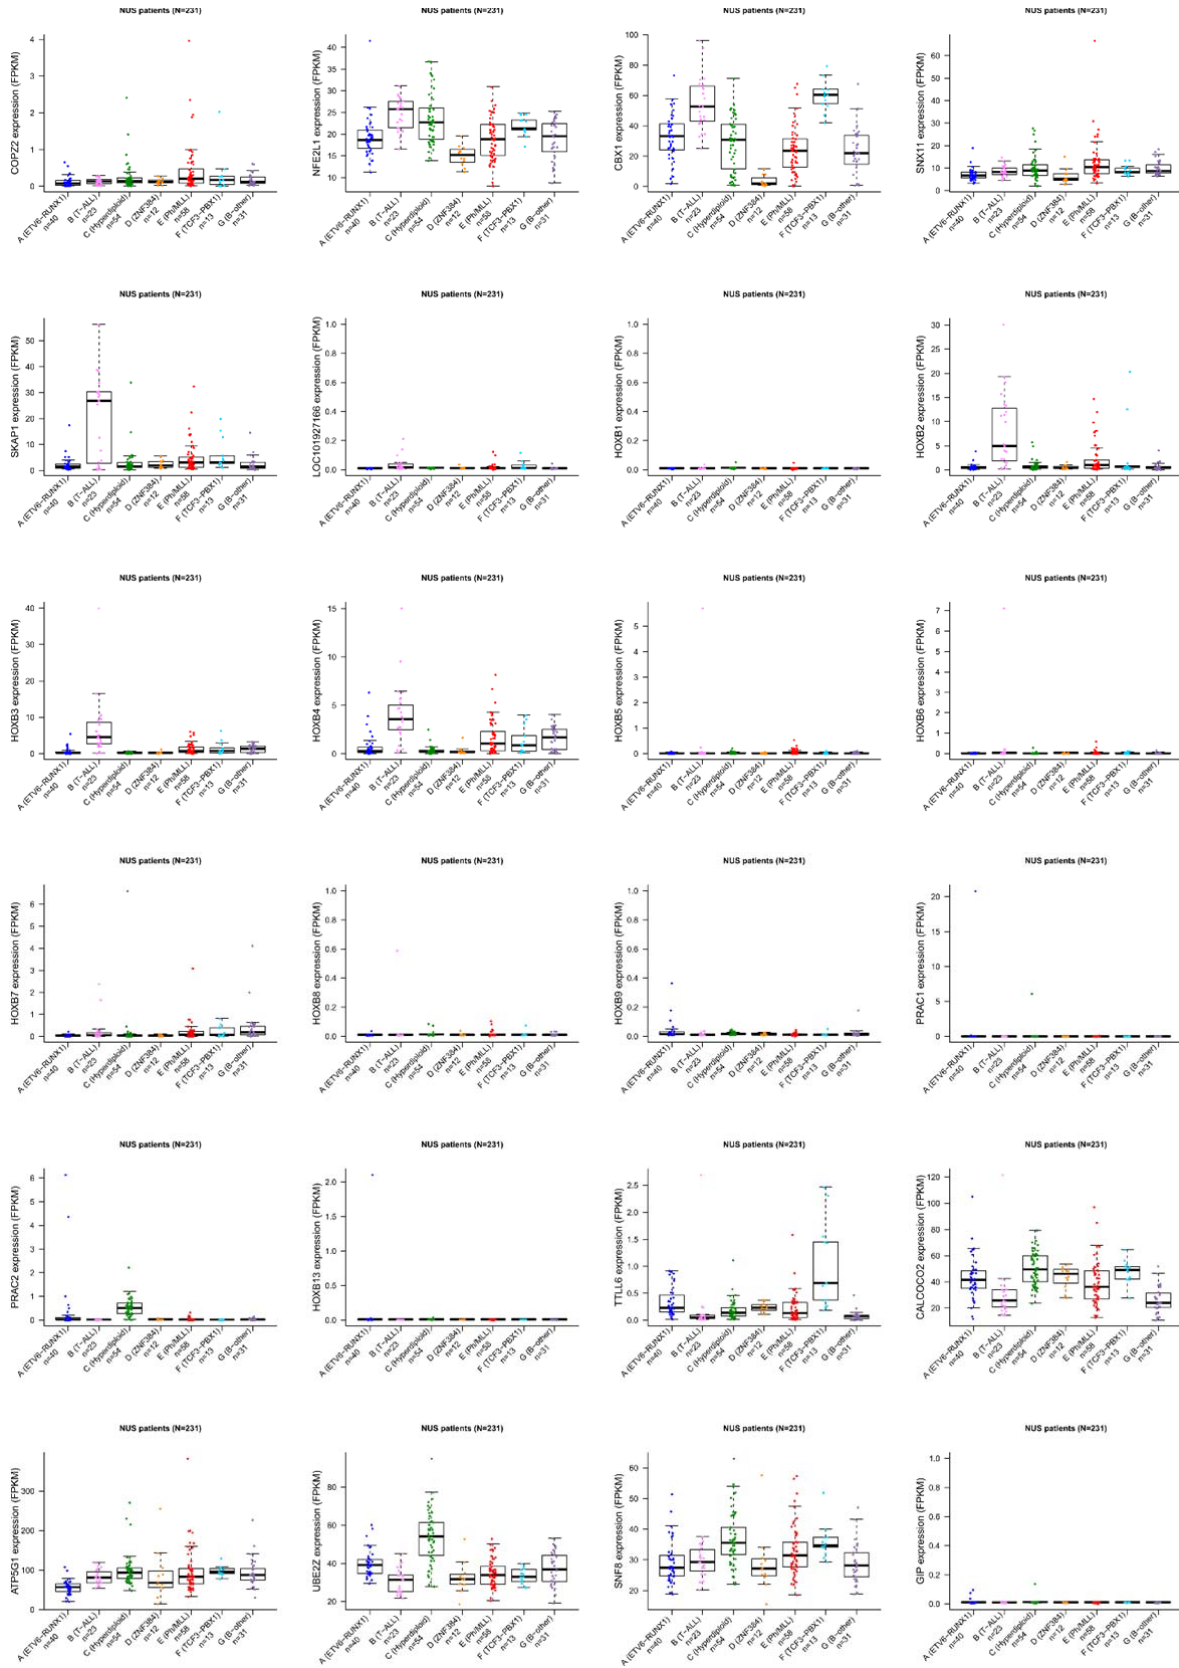

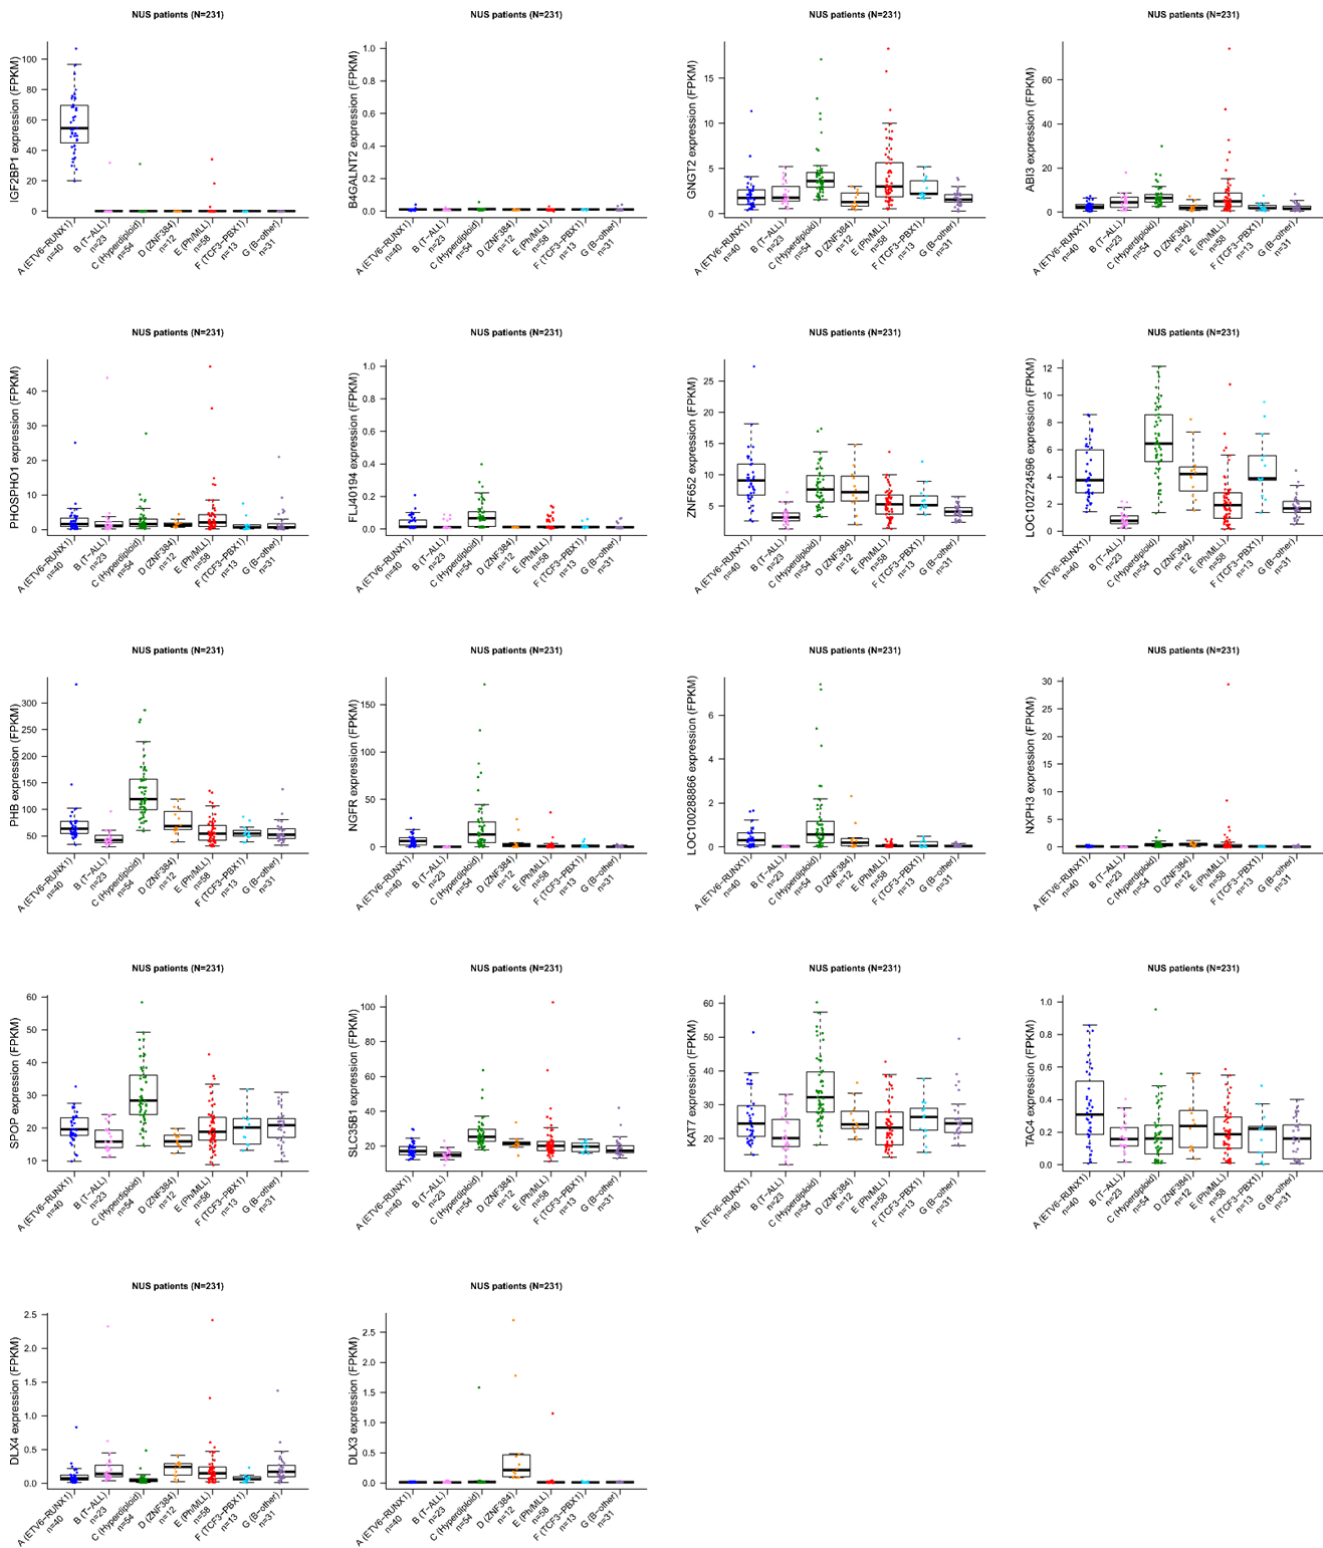

101

102

103 **Supplementary Figure 11: Expression of all RefSeq genes within 1MB of the 17q12 locus in subgroups of ALL.**

104 There are seven different ALL subgroups identified by unsupervised hierarchical clustering of gene expression profile  
 105 from 231 children with newly diagnosed ALL<sup>5</sup>. Each sample is represented by a dot and is colour-coded according to  
 106 the subgroups it belongs to. No gene but *IGF2BP1* in this region was over-expressed specifically in the *ETV6-RUNX1*  
 107 positive ALL subgroup.

108

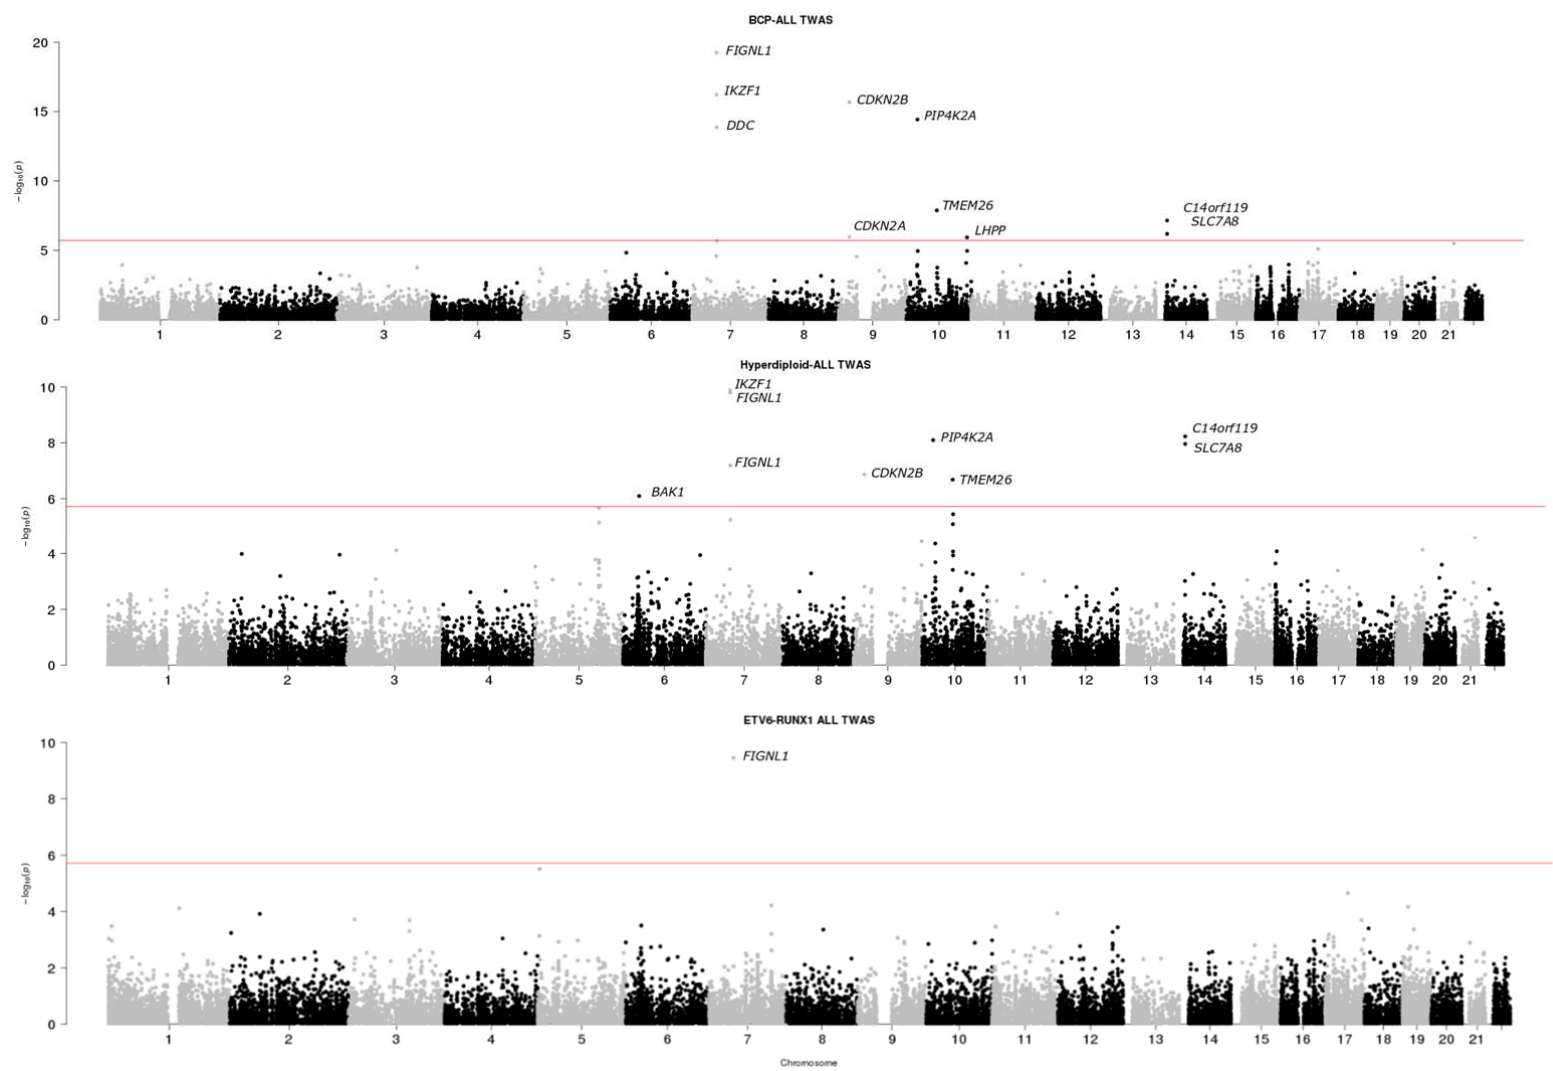

109

110 **Supplementary Figure 12: Results from a multivariate analysis across 48 tissue eQTLs using summary data from B-ALL, high-hyperdiploid ALL and *ETV6-RUNX1* ALL using**  
 111 **Multixcan.** Red line indicates  $P$ -value threshold of  $1.9 \times 10^{-6}$ . On the X axis the chromosomes are shown while the Y-axis shows  $-\log_{10}(P)$ .

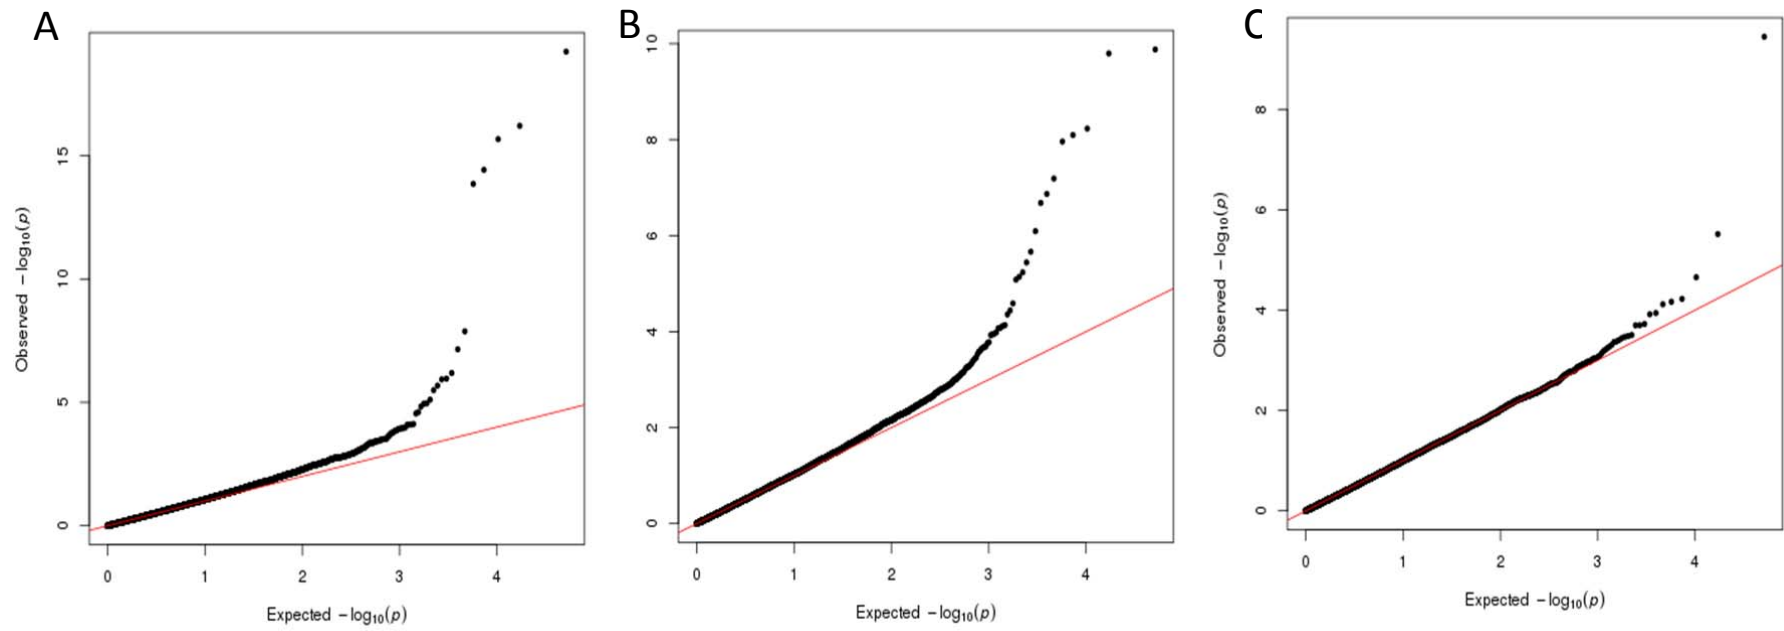

112

113 **Supplementary Figure 13: QQ plots generated for the sMultixcan analysis for A: B-ALL, B: High-hyperdiploid ALL and C: *ETV6-RUNX1* positive ALL**



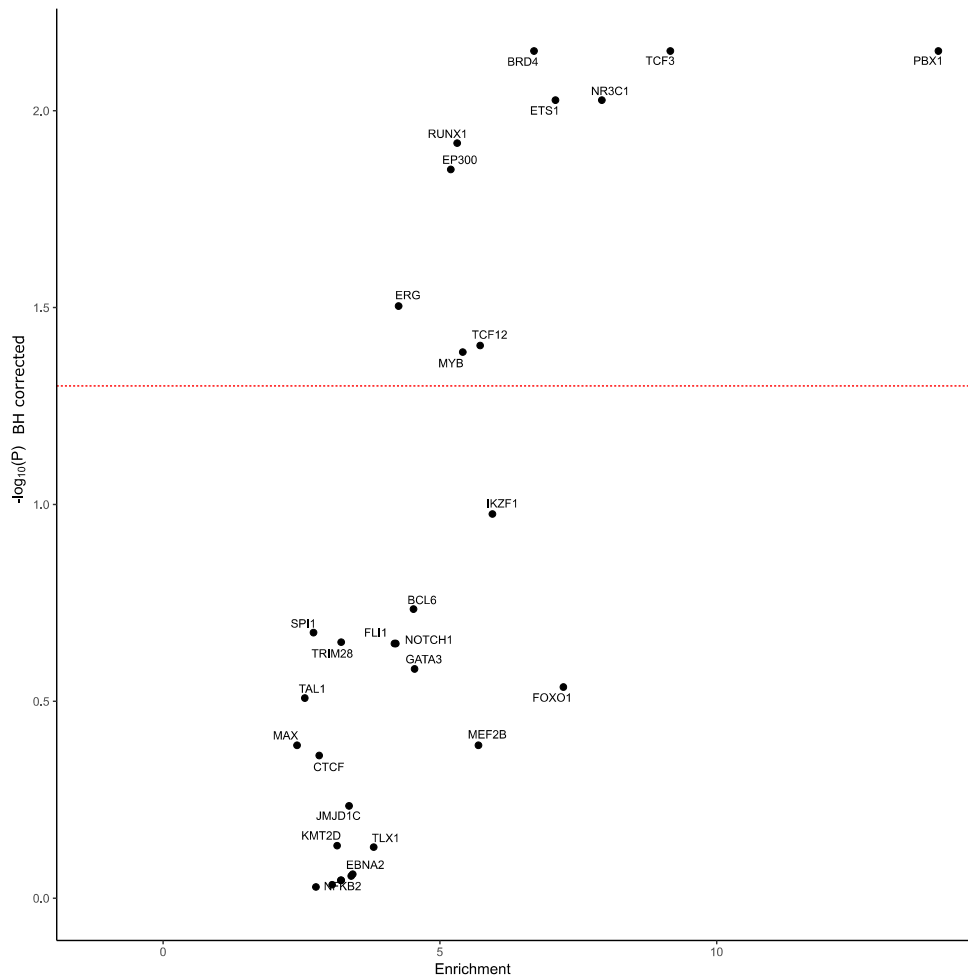

115

116

117 **Supplementary Figure 14: Enrichment of transcription factor binding at ALL risk loci.** The  
 118 frequency of transcription factor binding to risk SNPs ( $r^2$  with lead SNP > 0.8) was tallied and  
 119 compared to the frequency of binding to 10,000 random SNP permutations. The graph  
 120 shows the fold enrichment (x-axis) and Benjamini–Hochberg corrected P-value (y-axis)  
 121 performed for over 200 transcription factor binding profiles derived from ChIP experiemnts  
 122 performed in blood related cell lines, extracted from ChIP-Atlas. Transcription factors with  
 123 no enrichment are omitted.

124

125

126

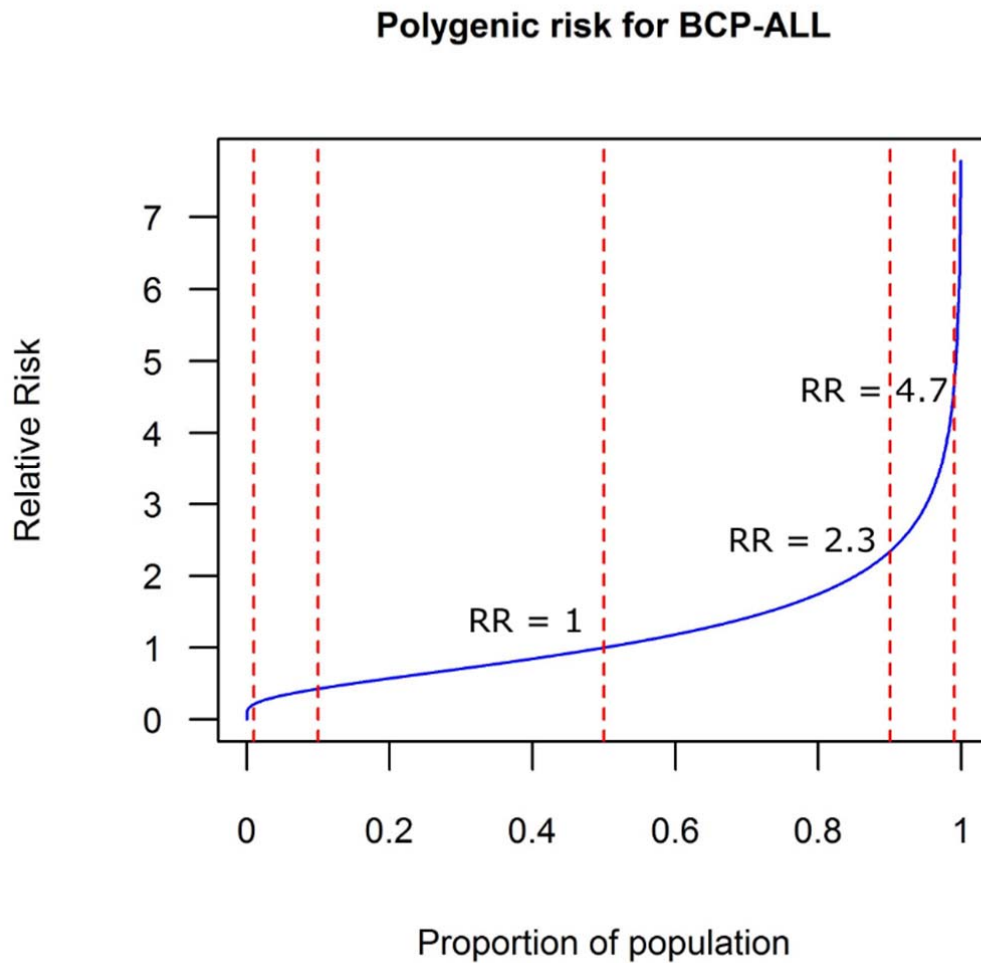

127

128

129 **Supplementary Figure 15: Distribution of ALL relative risk scores ordered by genetic risk.**

130 (risk is relative to population median risk). The blue line plots the distribution of relative risk

131 (RR) across the population; the red lines correspond to 1st, 10th, 50th, 90th and 99th

132 centiles. The RR figures presented in black are the average in the highest (i) 10th and (ii) 1

133 centile of genetic risk.

134

135

136 **Supplementary Table 1: Summary of results for all risk SNPs.** CHR: chromosome; BP: base pair; RAF: risk allele frequency; OR: odds ratio; CI: confidence intervals. OR and  
 137 CI are derived from current meta-analysis.

| CHR                                   | SNP (Subtype)                            | Locus (gene)                | Position (BP) | Risk Allele | RAF  | OR(95% CI)       | P-value                 |
|---------------------------------------|------------------------------------------|-----------------------------|---------------|-------------|------|------------------|-------------------------|
| Top SNPs at previously published loci |                                          |                             |               |             |      |                  |                         |
| 2                                     | rs17481869 ( <i>ETV6-RUNX1</i> postive)  | 2q22.3                      | 146124454     | A           | 0.08 | 1.74 (1.45-2.09) | 2.37x10 <sup>-09</sup>  |
| 7                                     | rs17133805                               | 7p12.2 ( <i>IKZF1</i> )     | 50477514      | G           | 0.32 | 1.65 (1.56-1.74) | 5.28x10 <sup>-71</sup>  |
| 8                                     | rs75777619                               | 8q24.21                     | 130185176     | G           | 0.12 | 1.26 (1.17-1.36) | 2.30x10 <sup>-09</sup>  |
| 9                                     | rs113650570                              | 9p21.3 ( <i>CDKN2A</i> )    | 21976402      | A           | 0.02 | 2.32 (2.03-2.65) | 8.06x10 <sup>-35</sup>  |
| 10                                    | rs10821936                               | 10q21.2 ( <i>ARID5B</i> )   | 63723577      | C           | 0.33 | 1.80 (1.71-1.89) | 1.19x10 <sup>-106</sup> |
| 10                                    | rs3824662                                | 10p14 ( <i>GATA3</i> )      | 8104208       | A           | 0.19 | 1.29 (1.21-1.38) | 3.57x10 <sup>-14</sup>  |
| 10                                    | rs2296624                                | 10p12.2 ( <i>PIP4K2A</i> )  | 22856946      | C           | 0.67 | 1.25 (1.18-1.32) | 2.79x10 <sup>-15</sup>  |
| 10                                    | rs12779301                               | 10q26.13 ( <i>LHPP</i> )    | 126292655     | C           | 0.66 | 1.22 (1.15-1.29) | 5.72x10 <sup>-13</sup>  |
| 12                                    | rs4762284                                | 12q23.1 ( <i>ELK3</i> )     | 96612762      | T           | 0.32 | 1.15 (1.12-1.19) | 3.75x10 <sup>-07</sup>  |
| 14                                    | rs2239630                                | 14q11.2 ( <i>CEBPE</i> )    | 23589349      | A           | 0.45 | 1.28 (1.22-1.35) | 1.72x10 <sup>-21</sup>  |
| 21                                    | rs9976326                                | 21q22.2 ( <i>ERG</i> )      | 39776485      | T           | 0.25 | 1.19 (1.12-1.26) | 1.11x10 <sup>-08</sup>  |
| Top SNPs at novel genome-wide loci    |                                          |                             |               |             |      |                  |                         |
| 5                                     | *rs11750693 (High-hyperdiploidy)         | 5q31.2 (near <i>KLHL3</i> ) | 137014631     | C           | 0.02 | 2.62(1.90-3.61)  | 4.09x10 <sup>-09</sup>  |
| 5                                     | rs886285 (High-hyperdiploidy)            | 5q31.1 ( <i>C5orf56</i> )   | 131765206     | T           | 0.34 | 1.29 (1.18-1.41) | 1.56x10 <sup>-08</sup>  |
| 6                                     | rs210143 (High-hyperdiploidy)            | 6p21.31 ( <i>BAK1</i> )     | 33546930      | C           | 0.73 | 1.30 (1.19-1.43) | 2.21x10 <sup>-08</sup>  |
| 7                                     | *rs74452384 ( <i>ETV6-RUNX1</i> postive) | 7q36.3 (near <i>UBE3C</i> ) | 156892518     | G           | 0.01 | 3.97(2.43-6.46)  | 3.16x10 <sup>-08</sup>  |
| 9                                     | rs76925697                               | 9q21.31                     | 83747371      | A           | 0.96 | 1.52 (1.31-1.76) | 2.11x10 <sup>-08</sup>  |
| 17                                    | rs10853104 ( <i>ETV6-RUNX1</i> postive)  | 17q21.32 ( <i>IGF2BP1</i> ) | 47092076      | T           | 0.47 | 1.33 (1.21-1.47) | 1.82x10 <sup>-08</sup>  |
| Novel subtype association             |                                          |                             |               |             |      |                  |                         |
| 21                                    | rs9976326 (High-hyperdiploidy)           | 21q22.2 ( <i>ERG</i> )      | 39776485      | T           | 0.25 | 1.33 (1.21-1.46) | 4.79x10 <sup>-09</sup>  |

138 \*Not validated in replication cohort.

139

140

141 **Supplementary Table 2: Results of validation of new genome-wide significant ALL risk loci in a replication cohort (COG-SJ-MESA-nonEA).** BP: Base pair; RAF,  
 142 risk allele frequency; OR:odds ratio; CI: confidence intervals; ALL: acute lymphoblastic leukaemia.

143

| SNP                              | Locus                  | Position (BP) | Risk Allele | B-ALL<br>(n = 2,237 vs 3,461) |                     |                       | High-hyperdiploidy<br>(n = 422 vs 3,461) |                     |                       | ETV6-RUNX1 positive<br>(n = 365 vs 3,461) |                     |                       |
|----------------------------------|------------------------|---------------|-------------|-------------------------------|---------------------|-----------------------|------------------------------------------|---------------------|-----------------------|-------------------------------------------|---------------------|-----------------------|
|                                  |                        |               |             | RAF                           | OR (95% CI)         | P-value               | RAF                                      | OR (95% CI)         | P-value               | RAF                                       | OR (95% CI)         | P-value               |
| <b>Validated</b>                 |                        |               |             |                               |                     |                       |                                          |                     |                       |                                           |                     |                       |
| rs76925697 (B-ALL)               | 9q21.31                | 83747371      | A           | 0.98 vs<br>0.97               | 1.69<br>(1.28-2.25) | 2.55x10 <sup>-4</sup> | 0.99 vs<br>0.97                          | 2.02<br>(1.15-3.52) | 1.38x10 <sup>-2</sup> | 0.98 vs<br>0.97                           | 2.09<br>(1.15-3.79) | 1.49x10 <sup>-2</sup> |
| rs886285 (High-hyperdiploidy)    | 5q31.1<br>(C5orf56)    | 131765206     | T           | 0.43 vs<br>0.42               | 1.10<br>(1.00-1.21) | 4.68x10 <sup>-2</sup> | 0.45 vs<br>0.42                          | 1.30<br>(1.10-1.52) | 1.87x10 <sup>-3</sup> | 0.43 vs<br>0.42                           | 1.08<br>(0.91-1.28) | 0.4                   |
| rs210143 (High-hyperdiploidy)    | 6p21.31<br>(BAK1)      | 33546930      | C           | 0.76 vs<br>0.74               | 1.13<br>(1.02-1.25) | 1.94x10 <sup>-2</sup> | 0.77 vs<br>0.74                          | 1.23<br>(1.03-1.49) | 2.66x10 <sup>-2</sup> | 0.73 vs<br>0.74                           | 0.98<br>(0.78-1.10) | 0.79                  |
| rs10853104 (ETV6-RUNX1 positive) | 17q21.32<br>(IGF2BP1)  | 47092076      | T           | 0.48 vs<br>0.46               | 1.05<br>(0.96-1.15) | 0.27                  | 0.47 vs<br>0.46                          | 1.06<br>(0.91-1.25) | 0.43                  | 0.55 vs<br>0.46                           | 1.36<br>(1.15-1.61) | 2.96x10 <sup>-4</sup> |
| <b>Not validated</b>             |                        |               |             |                               |                     |                       |                                          |                     |                       |                                           |                     |                       |
| rs11750693 (High-hyperdiploidy)  | 5q31.2 (near<br>KLHL3) | 137014631     | C           | 0.01 vs<br>0.01               | 0.99<br>(0.55-1.77) | 0.98                  | 0.01 vs<br>0.01                          | 1.39<br>(0.57-3.39) | 0.46                  | 0.01 vs<br>0.01                           | 1.15<br>(0.43-3.1)  | 0.77                  |
| rs74452384 (ETV6-RUNX1 positive) | 7q36.3 (near<br>UBE3C) | 156892518     | A           | 0.05 vs<br>0.06               | 0.78<br>(0.65-0.93) | 6.00x10 <sup>-3</sup> | 0.03 vs<br>0.06                          | 0.63<br>(0.42-0.93) | 2.18x10 <sup>-2</sup> | 0.05 vs<br>0.06                           | 0.77<br>(0.54-1.11) | 0.16                  |

144

145

146

147 **Supplementary Table 3: Ancestry diversity in the replication series.** Within the COG\_SJ cohort, genetic ancestry  
148 (European [CEU], African [YRI], East Asian [JPT/CHB], and Native American) was determined by using  
149 ADMIXTURE (version 1.3.0)<sup>6</sup>, with the sum of these 4 ancestries being 100% for any given subject.  
150 European American (EA), African American (AA), and Asian were defined as having >95% European genetic  
151 ancestry, >70% African ancestry, and >90% Asian ancestry, respectively. Hispanics were individuals for  
152 whom Native American ancestry was >10% and greater than African ancestry, as previously described<sup>7</sup>

| Genetically-defined race | B-ALL       | High-hyperdiploidy | ETV6-RUNX1 positive | Control (MESA) |
|--------------------------|-------------|--------------------|---------------------|----------------|
| Hispanics                | 1081 (48%)  | 190 (45%)          | 160 (44%)           | 682 (20%)      |
| Africans                 | 351 (16%)   | 57 (14%)           | 60 (16%)            | 1380 (40%)     |
| Other                    | 805 (36%)   | 175 (41%)          | 145 (40%)           | 1399 (40%)     |
| In total                 | 2237 (100%) | 422 (100%)         | 365 (100%)          | 3461 (100%)    |

153

154

156 **Supplementary Table 4: Genetic association with B-ALL, High-hyperdiploid and *ETV6-RUNX1* childhood**  
 157 **ALL subtypes at novel ALL risk locus.**  $P_{het}$ :  $P$  heterogeneity,  $I^2$ : Index to quantify dispersion of odds ratio, CI:  
 158 Confidence Intervals.

| rs76925697 (A/T, 9q21.31)                  | Allele-T frequency |          | Sample numbers |          | OR             | CI                 | P-value                     |
|--------------------------------------------|--------------------|----------|----------------|----------|----------------|--------------------|-----------------------------|
|                                            | Cases              | Controls | Cases          | Controls |                |                    |                             |
| <b>All B-ALL</b>                           |                    |          |                |          |                |                    |                             |
| UK GWAS I                                  | 0.02               | 0.03     | 824            | 5,200    | 0.56           | (0.41-0.75)        | 1.4x10 <sup>-4</sup>        |
| German GWAS                                | 0.02               | 0.04     | 834            | 2,024    | 0.61           | (0.43-0.86)        | 5.3x10 <sup>-3</sup>        |
| UK GWAS II                                 | 0.03               | 0.04     | 784            | 7,385    | 0.73           | (0.55-0.98)        | 3.7x10 <sup>-2</sup>        |
| COG_SJ_MESA                                | 0.02               | 0.04     | 2,879          | 2,057    | 0.71           | (0.55-0.91)        | 5.3x10 <sup>-3</sup>        |
| Total                                      |                    |          | 5,321          | 16,666   |                |                    |                             |
| <b>Meta OR and P-value</b>                 |                    |          |                |          | <b>0.66</b>    | <b>(0.57-0.76)</b> | <b>2.11x10<sup>-8</sup></b> |
|                                            |                    |          |                |          | $P_{het}=0.53$ |                    | $I^2=0\%$                   |
| <b>High-hyperdiploid</b>                   |                    |          |                |          |                |                    |                             |
| UK GWAS I                                  | 0.01               | 0.03     | 289            | 5,200    | 0.46           | (0.29-0.74)        | 1.5x10 <sup>-3</sup>        |
| German GWAS                                | 0.02               | 0.04     | 176            | 2,024    | 0.54           | (0.29-1.01)        | 5.6x10 <sup>-2</sup>        |
| UK GWAS II                                 | 0.03               | 0.04     | 251            | 7,385    | 0.77           | (0.46-0.73)        | 0.33                        |
| COG_SJ_MESA                                | 0.02               | 0.04     | 653            | 2,057    | 0.60           | (0.42-0.86)        | 5.8x10 <sup>-3</sup>        |
| Total                                      |                    |          | 1,369          | 16,666   |                |                    |                             |
| <b>Meta OR and P-value</b>                 |                    |          |                |          | <b>0.58</b>    | <b>(0.46-0.73)</b> | <b>6.45x10<sup>-6</sup></b> |
|                                            |                    |          |                |          | $P_{het}=0.58$ |                    | $I^2=0\%$                   |
| <b><i>ETV6-RUNX1</i> positive</b>          |                    |          |                |          |                |                    |                             |
| UK GWAS I                                  | 0.02               | 0.03     | 126            | 5,200    | 0.60           | (0.30-1.22)        | 0.16                        |
| German GWAS                                | 0.02               | 0.04     | 63             | 2,024    | 0.59           | (0.20-1.71)        | 0.33                        |
| UK GWAS II                                 | 0.03               | 0.04     | 220            | 7,385    | 0.80           | (0.56-0.97)        | 0.42                        |
| COG_SJ_MESA                                | 0.03               | 0.04     | 527            | 2,057    | 0.77           | (0.52-1.14)        | 0.19                        |
| Total                                      |                    |          | 936            | 16,666   |                |                    |                             |
| <b>Meta OR and P-value</b>                 |                    |          |                |          | <b>0.73</b>    | <b>(0.56-0.97)</b> | <b>3.02x10<sup>-2</sup></b> |
|                                            |                    |          |                |          | $P_{het}=0.89$ |                    | $I^2=0\%$                   |
| <b>rs9976326 (A/T,21q22.2, <i>ERG</i>)</b> |                    |          |                |          |                |                    |                             |
| rs9976326 (A/T,21q22.2, <i>ERG</i> )       | Allele-T frequency |          | Sample numbers |          | OR             | CI                 | P-value                     |
|                                            | Cases              | Controls | Cases          | Controls |                |                    |                             |
| <b>All B-ALL</b>                           |                    |          |                |          |                |                    |                             |
| UK GWAS I                                  | 0.28               | 0.25     | 824            | 5,200    | 1.20           | (1.06-1.26)        | 4.1x10 <sup>-3</sup>        |
| German GWAS                                | 0.30               | 0.26     | 834            | 2,024    | 1.22           | (1.06-1.41)        | 6.1x10 <sup>-3</sup>        |
| UK GWAS II                                 | 0.28               | 0.25     | 784            | 7,385    | 1.18           | (1.04-1.33)        | 9.3x10 <sup>-3</sup>        |
| COG_SJ_MESA                                | 0.29               | 0.25     | 2,879          | 2,057    | 1.17           | (1.06-1.29)        | 1.3x10 <sup>-3</sup>        |
| Total                                      |                    |          | 5,321          | 16,666   |                |                    |                             |
| <b>Meta OR and P-value</b>                 |                    |          |                |          | <b>1.19</b>    | <b>(1.12-1.26)</b> | <b>1.11x10<sup>-8</sup></b> |
|                                            |                    |          |                |          | $P_{het}=0.97$ |                    | $I^2=0\%$                   |
| <b>High-hyperdiploid</b>                   |                    |          |                |          |                |                    |                             |

|                             |      |      |       |        |                               |                    |                             |
|-----------------------------|------|------|-------|--------|-------------------------------|--------------------|-----------------------------|
| UK GWAS I                   | 0.33 | 0.25 | 289   | 5,200  | 1.61                          | (1.32-1.96)        | 2.22x10 <sup>-6</sup>       |
| German GWAS                 | 0.30 | 0.26 | 176   | 2,024  | 1.22                          | (0.93-1.59)        | 0.15                        |
| UK GWAS II                  | 0.30 | 0.25 | 251   | 7,385  | 1.32                          | (1.07-1.64)        | 1x10 <sup>-2</sup>          |
| COG_SJ_MESA                 | 0.29 | 0.25 | 653   | 2,057  | 1.23                          | (1.07-1.42)        | 4.1x10 <sup>-3</sup>        |
| Total                       |      |      | 1,369 | 16,666 |                               |                    |                             |
| <b>Meta OR and P -value</b> |      |      |       |        | <b>1.33</b>                   | <b>(1.21-1.46)</b> | <b>4.79x10<sup>-9</sup></b> |
|                             |      |      |       |        | <i>P</i> <sub>het</sub> =0.17 |                    | <i>I</i> <sup>2</sup> =41%  |

|                             |      |      |     |        |                               |                    |                           |
|-----------------------------|------|------|-----|--------|-------------------------------|--------------------|---------------------------|
| <b>ETV6-RUNX1 positive</b>  |      |      |     |        |                               |                    |                           |
| UK GWAS I                   | 0.26 | 0.25 | 126 | 5,200  | 1.07                          | (0.80-1.44)        | 0.66                      |
| German GWAS                 | 0.26 | 0.26 | 63  | 2,024  | 0.99                          | (0.64-1.54)        | 0.98                      |
| UK GWAS II                  | 0.24 | 0.25 | 220 | 7,385  | 0.92                          | (0.73-1.15)        | 0.45                      |
| COG_SJ_MESA                 | 0.24 | 0.25 | 527 | 2,057  | 0.94                          | (0.80-1.10)        | 0.42                      |
| Total                       |      |      | 936 | 16,666 |                               |                    |                           |
| <b>Meta OR and P -value</b> |      |      |     |        | <b>0.95</b>                   | <b>(0.85-1.07)</b> | <b>0.42</b>               |
|                             |      |      |     |        | <i>P</i> <sub>het</sub> =0.85 |                    | <i>I</i> <sup>2</sup> =0% |

|                                        |                           |                 |                       |                 |                               |                    |                            |
|----------------------------------------|---------------------------|-----------------|-----------------------|-----------------|-------------------------------|--------------------|----------------------------|
| <b>rs886285 (C/T, 5q31.1, C5orf56)</b> | <b>Allele-T frequency</b> |                 | <b>Sample numbers</b> |                 | <b>OR</b>                     | <b>CI</b>          | <b>P -value</b>            |
|                                        | <b>Cases</b>              | <b>Controls</b> | <b>Cases</b>          | <b>Controls</b> |                               |                    |                            |
| <b>All B-ALL</b>                       |                           |                 |                       |                 |                               |                    |                            |
| UK GWAS I                              | 0.33                      | 0.31            | 824                   | 5,200           | 0.94                          | (0.84-1.05)        | 0.27                       |
| German GWAS                            | 0.38                      | 0.34            | 834                   | 2,024           | 0.84                          | (0.74-0.96)        | 9.7x10 <sup>-3</sup>       |
| UK GWAS II                             | 0.35                      | 0.31            | 784                   | 7,385           | 0.83                          | (0.74-0.93)        | 9.0x10 <sup>-4</sup>       |
| COG_SJ_MESA                            | 0.33                      | 0.32            | 2,879                 | 2,057           | 0.96                          | (0.87-1.05)        | 0.37                       |
| Total                                  |                           |                 | 5,321                 | 16,666          |                               |                    |                            |
| <b>Meta OR and P -value</b>            |                           |                 |                       |                 | <b>0.90</b>                   | <b>(0.85-0.95)</b> | <b>1.6x10<sup>-4</sup></b> |
|                                        |                           |                 |                       |                 | <i>P</i> <sub>het</sub> =0.14 |                    | <i>I</i> <sup>2</sup> =45% |

|                             |      |      |       |        |                               |                    |                             |
|-----------------------------|------|------|-------|--------|-------------------------------|--------------------|-----------------------------|
| <b>High-hyperdiploid</b>    |      |      |       |        |                               |                    |                             |
| UK GWAS I                   | 0.34 | 0.31 | 289   | 5,200  | 0.88                          | (0.73-1.05)        | 9.2x10 <sup>-2</sup>        |
| German GWAS                 | 0.43 | 0.34 | 176   | 2,024  | 0.68                          | (0.54-0.86)        | 1.4x10 <sup>-3</sup>        |
| UK GWAS II                  | 0.41 | 0.31 | 251   | 7,385  | 0.64                          | (0.53-0.77)        | 4.6x10 <sup>-6</sup>        |
| COG_SJ_MESA                 | 0.36 | 0.32 | 653   | 2,057  | 0.83                          | (0.73-0.96)        | 9.1x10 <sup>-3</sup>        |
| Total                       |      |      | 1,369 | 16,666 |                               |                    |                             |
| <b>Meta OR and P -value</b> |      |      |       |        | <b>0.78</b>                   | <b>(0.71-0.85)</b> | <b>1.56x10<sup>-8</sup></b> |
|                             |      |      |       |        | <i>P</i> <sub>het</sub> =0.05 |                    | <i>I</i> <sup>2</sup> =62%  |

|                             |      |      |     |        |                               |                    |                           |
|-----------------------------|------|------|-----|--------|-------------------------------|--------------------|---------------------------|
| <b>ETV6-RUNX1 positive</b>  |      |      |     |        |                               |                    |                           |
| UK GWAS I                   | 0.32 | 0.31 | 126 | 5,200  | 0.98                          | (0.75-1.28)        | 0.87                      |
| German GWAS                 | 0.28 | 0.34 | 63  | 2,024  | 1.24                          | (1.84-1.84)        | 0.28                      |
| UK GWAS II                  | 0.34 | 0.31 | 220 | 7,385  | 0.90                          | (0.73-1.10)        | 0.31                      |
| COG_SJ_MESA                 | 0.32 | 0.32 | 527 | 2,057  | 1.0                           | (0.85-1.17)        | 0.98                      |
| Total                       |      |      | 936 | 16,666 |                               |                    |                           |
| <b>Meta OR and P -value</b> |      |      |     |        | <b>0.98</b>                   | <b>(0.88-1.10)</b> | <b>0.43</b>               |
|                             |      |      |     |        | <i>P</i> <sub>het</sub> =0.55 |                    | <i>I</i> <sup>2</sup> =0% |

|                                |                 |  |               |  |  |  |  |
|--------------------------------|-----------------|--|---------------|--|--|--|--|
| <b>rs210143 (C/T, 6p21.31,</b> | <b>Allele-T</b> |  | <b>Sample</b> |  |  |  |  |
|--------------------------------|-----------------|--|---------------|--|--|--|--|

| <b>BAK1)</b>                               | frequency          |          | numbers        |          |             |                               |                             |
|--------------------------------------------|--------------------|----------|----------------|----------|-------------|-------------------------------|-----------------------------|
| <b>All B-ALL</b>                           | Cases              | Controls | Cases          | Controls | OR          | CI                            | <i>P</i> -value             |
| UK GWAS I                                  | 0.25               | 0.31     | 824            | 5,200    | 1.32        | (1.10-1.58)                   | 7.3x10 <sup>-2</sup>        |
| German GWAS                                | 0.22               | 0.28     | 834            | 2,024    | 1.30        | (1.01-1.68)                   | 7.0x10 <sup>-3</sup>        |
| UK GWAS II                                 | 0.22               | 0.30     | 784            | 7,385    | 1.46        | (1.18-1.81)                   | 5.1x10 <sup>-3</sup>        |
| COG_SJ_MESA                                | 0.24               | 0.28     | 2,879          | 2,057    | 1.13        | (1.02-1.24)                   | 1.63x10 <sup>-2</sup>       |
| Total                                      |                    |          | 5,321          | 16,666   |             |                               |                             |
| <b>Meta OR and <i>P</i>-value</b>          |                    |          |                |          | <b>1.15</b> | <b>(1.08-1.22)</b>            | <b>1.74x10<sup>-6</sup></b> |
|                                            |                    |          |                |          |             | <i>P</i> <sub>het</sub> =0.74 | <i>I</i> <sup>2</sup> =0%   |
| <b>High-hyperdiploid</b>                   |                    |          |                |          |             |                               |                             |
| UK GWAS I                                  | 0.25               | 0.31     | 289            | 5,200    | 1.32        | (1.10-1.58)                   | 2.97x10 <sup>-3</sup>       |
| German GWAS                                | 0.22               | 0.28     | 176            | 2,024    | 1.30        | (1.01-1.68)                   | 4.03x10 <sup>-2</sup>       |
| UK GWAS II                                 | 0.22               | 0.30     | 251            | 7,385    | 1.46        | (1.18-1.81)                   | 3.22x10 <sup>-4</sup>       |
| COG_SJ_MESA                                | 0.24               | 0.28     | 653            | 2,057    | 1.23        | (1.06-1.42)                   | 1.63x10 <sup>-2</sup>       |
| Total                                      |                    |          | 1,369          | 16,666   |             |                               |                             |
| <b>Meta OR and <i>P</i>-value</b>          |                    |          |                |          | <b>1.30</b> | <b>(1.19-1.43)</b>            | <b>2.21x10<sup>-8</sup></b> |
|                                            |                    |          |                |          |             | <i>P</i> <sub>het</sub> =0.62 | <i>I</i> <sup>2</sup> =0%   |
| <b>ETV6-RUNX1 positive</b>                 |                    |          |                |          |             |                               |                             |
| UK GWAS I                                  | 0.34               | 0.31     | 126            | 5,200    | 0.86        | (0.66-1.13)                   | 0.27                        |
| German GWAS                                | 0.21               | 0.28     | 63             | 2,024    | 1.43        | (0.95-2.16)                   | 8.94x10 <sup>-2</sup>       |
| UK GWAS II                                 | 0.29               | 0.30     | 220            | 7,385    | 1.01        | (0.82-1.24)                   | 0.93                        |
| COG_SJ_MESA                                | 0.27               | 0.28     | 527            | 2,057    | 1.06        | (0.90-1.24)                   | 0.48                        |
| Total                                      |                    |          | 936            | 16,666   |             |                               |                             |
| <b>Meta OR and <i>P</i>-value</b>          |                    |          |                |          | <b>1.03</b> | <b>(0.92-1.15)</b>            | <b>0.59</b>                 |
|                                            |                    |          |                |          |             | <i>P</i> <sub>het</sub> =     | <i>I</i> <sup>2</sup> =0%   |
| <b>rs10853104 (T/C, 17q21.32, IGF2BP1)</b> |                    |          |                |          |             |                               |                             |
| <b>All B-ALL</b>                           | Allele-C frequency |          | Sample numbers |          |             |                               |                             |
| <b>All B-ALL</b>                           | Cases              | Controls | Cases          | Controls | OR          | CI                            | <i>P</i> -value             |
| UK GWAS I                                  | 0.49               | 0.50     | 824            | 5,200    | 1.03        | (0.92-1.14)                   | 0.64                        |
| German GWAS                                | 0.49               | 0.49     | 834            | 2,024    | 0.99        | (0.87-1.11)                   | 0.82                        |
| UK GWAS II                                 | 0.47               | 0.48     | 784            | 7,385    | 1.07        | (0.96-1.19)                   | 0.20                        |
| COG_SJ_MESA                                | 0.48               | 0.49     | 2,879          | 2,057    | 1.06        | (0.98-1.16)                   | 0.16                        |
| Total                                      |                    |          | 5,321          | 16,666   |             |                               |                             |
| <b>Meta OR and <i>P</i>-value</b>          |                    |          |                |          | <b>1.04</b> | <b>(0.99-1.10)</b>            | <b>0.11</b>                 |
|                                            |                    |          |                |          |             | <i>P</i> <sub>het</sub> =0.71 | <i>I</i> <sup>2</sup> =0%   |
| <b>High-hyperdiploid</b>                   |                    |          |                |          |             |                               |                             |
| UK GWAS I                                  | 0.52               | 0.50     | 289            | 5,200    | 0.91        | (0.77-1.08)                   | 0.28                        |
| German GWAS                                | 0.53               | 0.51     | 176            | 2,024    | 0.92        | (0.74-1.16)                   | 0.50                        |
| UK GWAS II                                 | 0.49               | 0.48     | 251            | 7,385    | 0.98        | (0.81-1.17)                   | 0.78                        |
| COG_SJ_MESA                                | 0.50               | 0.49     | 653            | 2,057    | 0.98        | (0.87-1.12)                   | 0.82                        |
| Total                                      |                    |          | 1,369          | 16,666   |             |                               |                             |
| <b>Meta OR and <i>P</i>-value</b>          |                    |          |                |          | <b>0.96</b> | <b>(0.88-1.04)</b>            | <b>0.29</b>                 |



$P_{het}=0.88$   $I^2=0\%$

---

| <b>ETV6-RUNX1 positive</b> |      |      |     |        |                |                    |                                         |
|----------------------------|------|------|-----|--------|----------------|--------------------|-----------------------------------------|
| UK GWAS I                  | 0.43 | 0.50 | 126 | 5,200  | 1.32           | (1.02-1.69)        | $3.18 \times 10^{-2}$                   |
| German GWAS                | 0.41 | 0.51 | 63  | 2,024  | 1.52           | (1.05-2.21)        | $2.60 \times 10^{-2}$                   |
| UK GWAS II                 | 0.45 | 0.48 | 220 | 7,385  | 1.15           | (0.95-1.40)        | 0.14                                    |
| COG_SJ_MESA                | 0.40 | 0.49 | 527 | 2,057  | 1.42           | (1.23-1.64)        | $1.28 \times 10^{-6}$                   |
| Total                      |      |      | 936 | 16,666 |                |                    |                                         |
| <b>Meta OR and P-value</b> |      |      |     |        | <b>1.33</b>    | <b>(1.21-1.47)</b> | <b><math>1.82 \times 10^{-8}</math></b> |
|                            |      |      |     |        | $P_{het}=0.33$ | $I^2=13\%$         |                                         |

---

160 **Supplementary Table 5: Genotype counts of risk alleles for the individual cohorts post**  
 161 **imputation.**

| <b>SNP(Type)</b>                              | <b>Genotype count</b> |           |           |           |           |           |
|-----------------------------------------------|-----------------------|-----------|-----------|-----------|-----------|-----------|
| <b>rs76925697 (9q21.31, B-ALL)</b>            | <b>AA</b>             | <b>AT</b> | <b>TT</b> | <b>AA</b> | <b>AT</b> | <b>TT</b> |
| UK GWAS I                                     | 797                   | 26        | 1         | 4843      | 354       | 4         |
| German GWAS                                   | 798                   | 35        | 1         | 1879      | 141       | 4         |
| UKGWAS II                                     | 742                   | 42        | 0         | 6854      | 522       | 10        |
| COG-SJ_MESA                                   | 2743                  | 135       | 1         | 1916      | 138       | 3         |
| <b>rs9976326 (ERG, B-ALL)</b>                 | <b>AA</b>             | <b>AT</b> | <b>TT</b> | <b>AA</b> | <b>AT</b> | <b>TT</b> |
| UK GWAS I                                     | 429                   | 332       | 63        | 2969      | 1912      | 318       |
| German GWAS                                   | 401                   | 366       | 67        | 1082      | 828       | 114       |
| UKGWAS II                                     | 410                   | 304       | 71        | 4093      | 2818      | 474       |
| COG-SJ_MESA                                   | 1500                  | 1143      | 235       | 1179      | 734       | 144       |
| <b>rs9976326 (ERG, High-hyperdiploidy)</b>    | <b>AA</b>             | <b>AT</b> | <b>TT</b> | <b>AA</b> | <b>AT</b> | <b>TT</b> |
| UK GWAS I                                     | 128                   | 131       | 30        | 2969      | 1912      | 318       |
| German GWAS                                   | 85                    | 77        | 14        | 1082      | 828       | 114       |
| UKGWAS II                                     | 121                   | 108       | 22        | 4093      | 2818      | 474       |
| COG-SJ_MESA                                   | 325                   | 271       | 57        | 1179      | 734       | 144       |
| <b>rs886285 (C5orf56, High-hyperdiploidy)</b> | <b>CC</b>             | <b>CT</b> | <b>TT</b> | <b>CC</b> | <b>CT</b> | <b>TT</b> |
| UK GWAS I                                     | 39                    | 118       | 131       | 497       | 2257      | 2446      |
| German GWAS                                   | 34                    | 82        | 60        | 238       | 911       | 875       |
| UKGWAS II                                     | 43                    | 120       | 88        | 745       | 3144      | 3495      |
| COG-SJ_MESA                                   | 92                    | 287       | 274       | 204       | 914       | 939       |
| <b>rs210143 (BAK1, High-hyperdiploidy)</b>    | <b>CC</b>             | <b>CT</b> | <b>TT</b> | <b>CC</b> | <b>CT</b> | <b>TT</b> |
| UK GWAS I                                     | 16                    | 111       | 162       | 500       | 2186      | 2514      |
| German GWAS                                   | 12                    | 55        | 109       | 154       | 836       | 1034      |
| UKGWAS II                                     | 13                    | 86        | 152       | 648       | 3063      | 3673      |
| COG-SJ_MESA                                   | 40                    | 231       | 382       | 157       | 821       | 1079      |
| <b>rs10853104 (IGF2BP1, ETV6-RUNX1)</b>       | <b>TT</b>             | <b>CT</b> | <b>CC</b> | <b>TT</b> | <b>CT</b> | <b>CC</b> |
| UK GWAS I                                     | 25                    | 58        | 43        | 1285      | 2604      | 1311      |
| German GWAS                                   | 10                    | 31        | 22        | 525       | 1004      | 494       |
| UKGWAS II                                     | 49                    | 100       | 71        | 1694      | 3751      | 1940      |
| COG-SJ_MESA                                   | 86                    | 252       | 189       | 505       | 1022      | 530       |

162

163  
164  
165

**Supplementary Table 6: Conditional analysis on the most significant SNP at all previously identified and novel risk loci within a one MB window.**  
CHR: chromosome; BP: base pair; RAF: risk allele frequency; OR: odds ratio; CI: confidence intervals. OR and CI are derived from current meta-analysis.

| CHR                       | Top SNP at locus (conditioned on) | P-value                 | Locus (gene)                | Position (BP) | Risk Allele | Post-conditional top SNP | P-value (Post-conditional) | P-value (Pre-conditional) |
|---------------------------|-----------------------------------|-------------------------|-----------------------------|---------------|-------------|--------------------------|----------------------------|---------------------------|
| <b>B-ALL</b>              |                                   |                         |                             |               |             |                          |                            |                           |
| 7                         | rs17133805                        | 5.28x10 <sup>-71</sup>  | 7p12.2 ( <i>IKZF1</i> )     | 50477514      | G           | rs6421315                | 1.43x10 <sup>-08</sup>     | 5.28x10 <sup>-11</sup>    |
| 8                         | rs75777619                        | 2.30x10 <sup>-09</sup>  | 8q24.21                     | 130185176     | G           | rs4733633                | 3.93x10 <sup>-04</sup>     | 6.70x10 <sup>-04</sup>    |
| 9                         | rs113650570                       | 8.06x10 <sup>-35</sup>  | 9p21.3 ( <i>CDKN2A</i> )    | 21976402      | A           | rs944800                 | 4.05x10 <sup>-08</sup>     | 4.12x10 <sup>-07</sup>    |
| 9                         | *rs76925697                       | 2.11x10 <sup>-08</sup>  | 9q21.31                     | 83747371      | A           | rs2796471                | 3.12x10 <sup>-05</sup>     | 8.04x10 <sup>-05</sup>    |
| 10                        | rs10821936                        | 1.19x10 <sup>-106</sup> | 10q21.2 ( <i>ARID5B</i> )   | 63723577      | C           | rs2893901                | 3.20x10 <sup>-03</sup>     | 1.09x10 <sup>-02</sup>    |
| 10                        | rs3824662                         | 3.57x10 <sup>-14</sup>  | 10p14 ( <i>GATA3</i> )      | 8104208       | A           | rs11255520               | 5.36x10 <sup>-04</sup>     | 2.68x10 <sup>-02</sup>    |
| 10                        | rs2296624                         | 2.79x10 <sup>-15</sup>  | 10p12.2 ( <i>PIP4K2A</i> )  | 22856946      | C           | rs74229974               | 1.33x10 <sup>-08</sup>     | 1.33x10 <sup>-08</sup>    |
| 10                        | rs12779301                        | 5.72x10 <sup>-13</sup>  | 10q26.13 ( <i>LHPP</i> )    | 126292655     | C           | rs11245326               | 4.90x10 <sup>-04</sup>     | 1.78x10 <sup>-07</sup>    |
| 14                        | rs2239630                         | 1.72x10 <sup>-21</sup>  | 14q11.2 ( <i>CEBPE</i> )    | 23589349      | A           | rs56031127               | 2.08x10 <sup>-04</sup>     | 1.35x10 <sup>-14</sup>    |
| 21                        | rs9976326                         | 1.11x10 <sup>-08</sup>  | 21q22.2 ( <i>ERG</i> )      | 39776485      | T           | rs9979478                | 1.69x10 <sup>-08</sup>     | 1.89x10 <sup>-08</sup>    |
| <b>ETV6-RUNX1</b>         |                                   |                         |                             |               |             |                          |                            |                           |
| 2                         | rs17481869                        | 2.37x10 <sup>-09</sup>  | 2q22.3                      | 146124454     | A           | rs13384504               | 2.06x10 <sup>-02</sup>     | 8.30x10 <sup>-04</sup>    |
| 17                        | *rs10853104                       | 1.82x10 <sup>-08</sup>  | 17q21.32 ( <i>IGF2BP1</i> ) | 47092076      | T           | rs12451571               | 9.69x10 <sup>-04</sup>     | 5.88x10 <sup>-04</sup>    |
| <b>High-hyperdiploidy</b> |                                   |                         |                             |               |             |                          |                            |                           |
| 5                         | *rs886285                         | 1.56x10 <sup>-08</sup>  | 5q31.1 ( <i>C5orf56</i> )   | 131765206     | T           | rs28435738               | 8.26x10 <sup>-05</sup>     | 1.86x10 <sup>-02</sup>    |
| 6                         | *rs210143                         | 2.21x10 <sup>-08</sup>  | 6p21.31 ( <i>BAK1</i> )     | 33546930      | C           | rs9461938                | 6.95x10 <sup>-04</sup>     | 1.59x10 <sup>-03</sup>    |
| 21                        | rs9976326                         | 4.79x10 <sup>-09</sup>  | 21q22.2 ( <i>ERG</i> )      | 39776485      | T           | rs9979478                | 9.37x10 <sup>-07</sup>     | 1.05x10 <sup>-06</sup>    |
| 10                        | rs10821936                        | 1.71x10 <sup>-96</sup>  | 10q21.2 ( <i>ARID5B</i> )   | 63723577      | C           | rs76420690               | 5.43x10 <sup>-04</sup>     | 3.87x10 <sup>-06</sup>    |

166

\*New loci discovered in current meta-analyses.

167 **Supplementary Table 7: Conditional analysis on the 21q22.2 locus (B-ALL)**

168

| SNP (gene)               | Meta-analysis <i>P</i> -value | Conditioned on rs9976326 | Conditioned on rs9979478 |
|--------------------------|-------------------------------|--------------------------|--------------------------|
| rs9976326 ( <i>ERG</i> ) | $1.11 \times 10^{-08}$        | -                        | $1.03 \times 10^{-08}$   |
| rs9979478 ( <i>ERG</i> ) | $1.89 \times 10^{-08}$        | $1.69 \times 10^{-08}$   | -                        |
|                          |                               |                          |                          |

169

170 **Supplementary Table 8: Lead SNPs used for filtering ChIC and ChIP data.** CHR: chromosome; POS:  
 171 position in basepair. *P*-value shown from the current meta-analysis.

| Locus                       | SNP               | Distance from lead SNP | r <sup>2</sup> | CHR       | POS (Hg19)       | <i>P</i> -value | Disease Subset    |
|-----------------------------|-------------------|------------------------|----------------|-----------|------------------|-----------------|-------------------|
| 6p21<br>( <i>BAK1</i> )     | <b>rs210143</b>   | <b>0</b>               | <b>1</b>       | <b>6</b>  | <b>33546930</b>  | <b>2.21E-08</b> | HD                |
|                             | rs210142          | -93                    | 1              | 6         | 33546837         | 2.34E-08        | HD                |
|                             | rs210134          | -6721                  | 0.8956         | 6         | 33540209         | 3.17E-07        | HD                |
| 5q31<br>( <i>IRF1</i> )     | <b>rs886285</b>   | <b>0</b>               | <b>1</b>       | <b>5</b>  | <b>131765206</b> | <b>1.56E-08</b> | HD                |
|                             | rs2522055         | 35393                  | 0.9264         | 5         | 131800599        | 2.83E-08        | HD                |
|                             | rs2706387         | 24351                  | 0.9264         | 5         | 131789557        | 3.96E-08        | HD                |
|                             | rs6865438         | 25210                  | 0.9264         | 5         | 131790416        | 4.02E-08        | HD                |
|                             | rs7703230         | 21402                  | 0.9349         | 5         | 131786608        | 4.06E-08        | HD                |
|                             | rs4475253         | 11300                  | 0.9736         | 5         | 131776506        | 4.12E-08        | HD                |
|                             | rs726923          | 21212                  | 0.9391         | 5         | 131786418        | 4.30E-08        | HD                |
|                             | rs12659708        | 24657                  | 0.9264         | 5         | 131789863        | 5.02E-08        | HD                |
|                             | rs2522043         | 26465                  | 0.9264         | 5         | 131791671        | 5.05E-08        | HD                |
|                             | rs12655512        | 24539                  | 0.9264         | 5         | 131789745        | 5.28E-08        | HD                |
|                             | rs2522044         | 26640                  | 0.9264         | 5         | 131791846        | 5.43E-08        | HD                |
|                             | rs4504381         | 20564                  | 0.9391         | 5         | 131785770        | 5.56E-08        | HD                |
|                             | rs10059611        | 22072                  | 0.9307         | 5         | 131787278        | 6.13E-08        | HD                |
| rs7713818                   | 23545             | 0.9219                 | 5              | 131788751 | 9.24E-08         | HD              |                   |
| rs6866467                   | 21847             | 0.8709                 | 5              | 131787053 | 1.90E-07         | HD              |                   |
| 21q22<br>( <i>ERG</i> )     | <b>rs9976326</b>  | <b>0</b>               | <b>1</b>       | <b>21</b> | <b>39776485</b>  | <b>4.79E-09</b> | <b>HD</b>         |
|                             | rs55681902        | 8267                   | 0.9681         | 21        | 39784752         | 2.43E-08        | HD                |
| 17q12<br>( <i>IGF2BP1</i> ) | <b>rs10853104</b> | <b>0</b>               | <b>1</b>       | <b>17</b> | <b>47092076</b>  | <b>1.82E-08</b> | <b>ETV6-RUNX1</b> |
| 9q21                        | <b>rs76925697</b> | <b>0</b>               | <b>1</b>       | <b>9</b>  | <b>83747371</b>  | <b>2.11E-08</b> | <b>Generic</b>    |
|                             | rs62579834        | 453                    | 1              | 9         | 83747824         | 2.12E-08        | Generic           |
|                             | rs62579836        | 5567                   | 0.9746         | 9         | 83752938         | 9.03E-08        | Generic           |
|                             | rs62579838        | 7695                   | 0.9746         | 9         | 83755066         | 1.21E-07        | Generic           |
|                             | rs62579841        | 10202                  | 0.9746         | 9         | 83757573         | 1.18E-07        | Generic           |
|                             | rs868524          | 14994                  | 0.9493         | 9         | 83762365         | 1.13E-07        | Generic           |

172 Top SNP in each locus shown in bold. HD = High-hyperdiploid ALL

173

174

175

176 **Supplementary Table 9: ChIC contacts at risk loci.** Lead SNPs at each locus used for filtering  
 177 ChIC and ChIP data defined by a  $P$ -value  $< P(\min) \times 50$  and  $R^2 > 0.8$  from the top SNP. Contact scores:  
 178 CHICAGO scores with significance ( $\geq 5$ ) as per<sup>4</sup>.

179

180 **Locus: rs10853104 chr17 (IGF2BP1)**

| SNP        | SNP bin start | SNP bin end | Promoter bin start | Promoter bin end | Contact score | Gene TSS            |
|------------|---------------|-------------|--------------------|------------------|---------------|---------------------|
| rs10853104 | 47089144      | 47092652    | 46701021           | 46706541         | 7.6           | HOXB9,HOXB-AS4      |
| rs10853104 | 47089144      | 47092652    | 46795626           | 46803741         | 10.3          | MIR3185,PRAC1,PRAC2 |
| rs10853104 | 47089144      | 47092652    | 46803742           | 46807447         | 11.0          | HOXB13              |
| rs10853104 | 47089144      | 47092652    | 46807448           | 46814524         | 8.3           | CTD-2377D24.4       |
| rs10853104 | 47089144      | 47092652    | 46892929           | 46896186         | 12.0          | TTL6                |

181

182 **Locus: rs886285 chr5 (C5orf56)**

| SNP                          | SNP bin start | SNP bin end | Promoter bin start | Promoter bin end | Contact score | Gene TSS                 |
|------------------------------|---------------|-------------|--------------------|------------------|---------------|--------------------------|
| rs2522043,rs2522044          | 131744512     | 131749741   | 131791495          | 131792921        | 5.4           | C5orf56                  |
| rs886285                     | 131758776     | 131769186   | 131784623          | 131785167        | 5.5           |                          |
| rs886285,rs2522043,rs2522044 | 131758776     | 131769186   | 131791495          | 131792921        | 6.5           | C5orf56                  |
| rs886285                     | 131758776     | 131769186   | 131814628          | 131819987        | 5.6           |                          |
| rs886285                     | 131758776     | 131769186   | 131819988          | 131821287        | 6.3           |                          |
| rs886285                     | 131758776     | 131769186   | 131821288          | 131825016        | 7.8           | IRF1                     |
| rs886285                     | 131758776     | 131769186   | 132153133          | 132153370        | 5.1           |                          |
| rs886285                     | 131758776     | 131769186   | 132208318          | 132210410        | 5.3           | LEAP2                    |
| rs886285                     | 131758776     | 131769186   | 132219272          | 132219773        | 5.0           |                          |
| rs886285                     | 131802698     | 131812303   | 131758776          | 131769186        | 5.3           | AC116366.6,C5orf56,Y_RNA |
| rs886285                     | 131825017     | 131826955   | 131758776          | 131769186        | 7.4           | IRF1                     |

183

184

185 **Locus: rs210143 chr6 (BAK1)**

| SNP               | SNP bin start | SNP bin end | Promoter bin start | Promoter bin end | Contact score | Gene TSS  |
|-------------------|---------------|-------------|--------------------|------------------|---------------|-----------|
| rs210142,rs210143 | 33542615      | 33551201    | 33381238           | 33386615         | 5.6           | CUTA,PHF1 |
| rs210142,rs210143 | 33542615      | 33551201    | 33386616           | 33392274         | 5.2           | SYNGAP1   |

|                               |          |          |          |          |     |                                |
|-------------------------------|----------|----------|----------|----------|-----|--------------------------------|
| <b>rs210142,<br/>rs210143</b> | 33542615 | 33551201 | 33255433 | 33256040 | 5.5 | <i>WDR46</i>                   |
| <b>rs210142,<br/>rs210143</b> | 33542615 | 33551201 | 33358373 | 33363613 | 6.2 | <i>KIFC1</i>                   |
| <b>rs210142,<br/>rs210143</b> | 33542615 | 33551201 | 33363614 | 33364413 | 6.0 |                                |
| <b>rs210142,<br/>rs210143</b> | 33542615 | 33551201 | 33392275 | 33392971 | 9.3 |                                |
| <b>rs210142,<br/>rs210143</b> | 33542615 | 33551201 | 33392972 | 33396741 | 7.9 |                                |
| <b>rs210142,<br/>rs210143</b> | 33542615 | 33551201 | 33396742 | 33402944 | 7.3 | <i>SYNGAP1</i>                 |
| <b>rs210142,<br/>rs210143</b> | 33542615 | 33551201 | 33402945 | 33403900 | 6.3 |                                |
| <b>rs210142,<br/>rs210143</b> | 33542615 | 33551201 | 33404397 | 33408750 | 7.5 | <i>MIR5004,<br/>SYNGAP1</i>    |
| <b>rs210142,<br/>rs210143</b> | 33542615 | 33551201 | 33408751 | 33418097 | 5.5 | <i>SYNGAP1</i>                 |
| <b>rs210142,<br/>rs210143</b> | 33542615 | 33551201 | 33423659 | 33424754 | 5.8 |                                |
| <b>rs210142,<br/>rs210143</b> | 33542615 | 33551201 | 33655559 | 33666990 | 5.6 | <i>MIR3934,SBP1,<br/>UQCC2</i> |
| <b>rs210142,<br/>rs210143</b> | 33542615 | 33551201 | 33666991 | 33679108 | 5.5 |                                |

186  
187  
188  
189  
190  
191  
192  
193  
194  
195  
196  
197  
198  
199  
200  
201  
202  
203  
204  
205  
206  
207  
208  
209

210 Supplementary Table 10: eQTL analysis of lead risk SNPs.

| Locus                        | rsID      | Blood genes                                                                          | Blood P-values                                     | MuTHER genes                                                                                             | MuTHER P-values                                          | CAGE genes                                    | CAGE P-values               |
|------------------------------|-----------|--------------------------------------------------------------------------------------|----------------------------------------------------|----------------------------------------------------------------------------------------------------------|----------------------------------------------------------|-----------------------------------------------|-----------------------------|
| 6p21.31<br>( <i>BAK1</i> )   | rs210143  | <i>BAK1</i><br><i>ITPR3</i><br><i>MNF1</i><br><i>PHF1,CUTA</i>                       | 3.3E-310<br>3.1E-21<br>10.0E-6<br>1.48569E-5       | <i>na</i>                                                                                                | <i>na</i>                                                | <i>HLA-DOA</i><br><i>BAK1</i><br><i>ITPR3</i> | 2E-13<br>1.3E-36<br>7.9E-08 |
|                              | rs210142  | <i>BAK1</i><br><i>ITPR3</i><br><i>MNF1</i><br><i>PHF1,CUTA</i>                       | 3.3E-310<br>3.1E-21<br>1.1E-5<br>1.3E-5            | <i>HLA-DOA</i><br><i>FLJ43752</i><br><i>HLA-DPB1</i><br><i>HLA-DOB</i><br><i>HLA-DPB2</i><br><i>TAP1</i> | 2.3E-4<br>1.1E-2<br>5.7E-5<br>5.9E-3<br>1.7E-2<br>2.2E-2 | <i>HLA-DOA</i><br><i>BAK1</i><br><i>ITPR3</i> | 1.2E-13<br>7.2E-38<br>1E-08 |
|                              | rs210134  | <i>BAK1</i><br><i>ITPR3</i><br><i>DAXX</i><br><i>PHF1,CUTA</i>                       | 3.7E-289<br>2.2E-16<br>4.4E-11<br>6.7E-5           | <i>HLA-DOA</i><br><i>FLJ43752</i><br><i>HLA-DPB1</i><br><i>HLA-DOB</i><br><i>HLA-DPB2</i>                | 3.8E-04<br>5.0E-2<br>4.1E-05<br>1.2E-2<br>1.2E-2         | <i>HLA-DOA</i><br><i>BAK1</i>                 | 7.2E-14<br>1.4E-33          |
| 5q31.1<br>( <i>C5orf56</i> ) | rs886285  | <i>SLC22A5</i><br><i>C5orf56</i><br><i>Y_RNA</i><br><i>SLC22A4</i><br><i>C5orf56</i> | 1.0E-47<br>4.5E-13<br>1.7E-12<br>4.7E-10<br>8.9E-5 | <i>HSPA4</i><br><i>CSF2</i><br><i>RAPGEF6</i><br><i>SLC22A5</i><br><i>RAD50</i>                          | 3.8E-2<br>3.1E-2<br>1.6E-2<br>9.1E-06<br>1.3E-05         | <i>na</i>                                     | <i>na</i>                   |
|                              | rs2522055 | <i>SLC22A5</i><br><i>C5orf56</i><br><i>Y_RNA</i><br><i>SLC22A4</i><br><i>C5orf56</i> | 2.7E-46<br>5.3E-14<br>7.5E-14<br>5.6E-10<br>8.6E-5 | <i>na</i>                                                                                                | <i>na</i>                                                | <i>na</i>                                     | <i>na</i>                   |
|                              | rs2706387 | <i>SLC22A5</i><br><i>C5orf56</i><br><i>SLC22A4</i>                                   | 5.1E-50<br>3.9E-12<br>4.7E-12                      | <i>HSPA4</i><br><i>FSTL4</i><br><i>RAPGEF6</i>                                                           | 2.3E-2<br>2.3E-2<br>1.6E-2                               | <i>na</i>                                     | <i>na</i>                   |



|                              |            |                                                                    |                                              |                                                                                                    |                                                            |    |    |
|------------------------------|------------|--------------------------------------------------------------------|----------------------------------------------|----------------------------------------------------------------------------------------------------|------------------------------------------------------------|----|----|
|                              |            | <i>Y_RNA</i>                                                       | 2.5E-11                                      | <i>SLC22A5</i><br><i>SHROOM1</i><br><i>RAD50</i>                                                   | 6.8E-06<br>3.5E-2<br>5.5E-06                               |    |    |
| 5q31.1<br>( <i>C5orf56</i> ) | rs6865438  | <i>SLC22A5</i><br><i>SLC22A4</i><br><i>C5orf56</i><br><i>Y_RNA</i> | 2.2E-50<br>4.1E-12<br>4.8E-12<br>2.72712E-11 | na                                                                                                 | na                                                         | na | na |
|                              | rs7703230  | <i>SLC22A5</i><br><i>C5orf56</i><br><i>SLC22A4</i><br><i>Y_RNA</i> | 2.1E-51<br>3.7E-12<br>4.1E-12<br>3.3E-11     | <i>HSPA4</i><br><i>FSTL4</i><br><i>RAPGEF6</i><br><i>SLC22A5</i><br><i>SHROOM1</i><br><i>RAD50</i> | 2.2E-2<br>4.0E-2<br>1.8E-2<br>3.1E-06<br>3.7E-2<br>5.5E-06 | na | na |
|                              | rs4475253  | <i>SLC22A5</i><br><i>C5orf56</i><br><i>Y_RNA</i><br><i>SLC22A4</i> | 8.0E-45<br>2.1E-14<br>3.0E-13<br>3.5E-10     | <i>HSPA4</i><br><i>CSF2</i><br><i>FSTL4</i><br><i>RAPGEF6</i><br><i>SLC22A5</i><br><i>RAD50</i>    | 3.6E-2<br>3.4E-2<br>4.5E-2<br>1.6E-2<br>1.0E-05<br>1.3E-05 | na | na |
|                              | rs726923   | <i>SLC22A5</i><br><i>SLC22A4</i><br><i>C5orf56</i><br><i>Y_RNA</i> | 1.9E-51<br>3.4E-12<br>3.9E-12<br>2.9E-11     | <i>RAPGEF6</i><br><i>SLC22A5</i><br><i>LEAP2</i><br><i>SHROOM1</i><br><i>RAD50</i>                 | 5.8E-3<br>1.5E-05<br>4.4E-2<br>3.1E-2<br>6.6E-07           | na | na |
|                              | rs12659708 | <i>SLC22A5</i><br><i>C5orf56</i><br><i>SLC22A4</i><br><i>Y_RNA</i> | 6.4E-50<br>3.9E-12<br>5.0E-12<br>2.5E-11     | na                                                                                                 | na                                                         | na | na |
|                              | rs2522043  | <i>SLC22A5</i><br><i>SLC22A4</i><br><i>C5orf56</i><br><i>Y_RNA</i> | 9.5E-51<br>3.8E-12<br>7.3E-12<br>3.2E-11     | na                                                                                                 | na                                                         | na | na |
|                              | rs12655512 | <i>SLC22A5</i>                                                     | 6.4E-50                                      | <i>HSPA4</i>                                                                                       | 2.3E-2                                                     | na | na |

|  |            |                |             |                |           |    |    |
|--|------------|----------------|-------------|----------------|-----------|----|----|
|  |            | <i>C5orf56</i> | 3.9E-12     | <i>FSTL4</i>   | 2.3E-2    |    |    |
|  |            | <i>SLC22A4</i> | 5.0E-12     | <i>RAPGEF6</i> | 1.6E-2    |    |    |
|  |            | <i>Y_RNA</i>   | 2.47907E-11 | <i>SLC22A5</i> | 6.7E-06   |    |    |
|  |            |                |             | <i>SHROOM1</i> | 3.5E-2    |    |    |
|  |            |                |             | <i>RAD50</i>   | 5.5E-06   |    |    |
|  | rs2522044  | <i>SLC22A5</i> | 8.8E-51     | <i>HSPA4</i>   | 2.3E-2    | na | na |
|  |            | <i>SLC22A4</i> | 3.4E-12     | <i>FSTL4</i>   | 2.3E-2    |    |    |
|  |            | <i>C5orf56</i> | 7.3E-12     | <i>RAPGEF6</i> | 1.6E-2    |    |    |
|  |            | <i>Y_RNA</i>   | 3.2E-11     | <i>SLC22A5</i> | 6.6E-06   |    |    |
|  |            |                |             | <i>SHROOM1</i> | 3.5E-2    |    |    |
|  |            |                |             | <i>RAD50</i>   | 5.5E-06   |    |    |
|  | rs4504381  | <i>SLC22A5</i> | 2.2E-50     | <i>HSPA4</i>   | 3.1E-2    | na | na |
|  |            | <i>C5orf56</i> | 2.0E-12     | <i>FSTL4</i>   | 2.9E-2    |    |    |
|  |            | <i>SLC22A4</i> | 3.4E-12     | <i>RAPGEF6</i> | 1.4E-2    |    |    |
|  |            | <i>Y_RNA</i>   | 2.1216E-11  | <i>SLC22A5</i> | 4.8E-06   |    |    |
|  |            |                |             | <i>SHROOM1</i> | 3.2E-2    |    |    |
|  |            |                |             | <i>RAD50</i>   | 4.6E-06   |    |    |
|  | rs10059611 | <i>SLC22A5</i> | 4.9E-51     | <i>HSPA4</i>   | 2.5E-2    | na | na |
|  |            | <i>SLC22A4</i> | 3.0E-12     | <i>FSTL4</i>   | 2.5E-2    |    |    |
|  |            | <i>C5orf56</i> | 1.1E-11     | <i>RAPGEF6</i> | 1.5E-2    |    |    |
|  |            | <i>Y_RNA</i>   | 3.3E-11     | <i>SLC22A5</i> | 5.790E-06 |    |    |
|  |            |                |             | <i>SHROOM1</i> | 0.0339    |    |    |
|  |            |                |             | <i>RAD50</i>   | 5.134E-06 |    |    |
|  | rs7713818  | <i>SLC22A5</i> | 5.1E-50     | <i>HSPA4</i>   | 2.3E-2    | na | na |
|  |            | <i>C5orf56</i> | 3.9E-12     | <i>FSTL4</i>   | 2.3E-2    |    |    |
|  |            | <i>SLC22A4</i> | 4.6E-12     | <i>RAPGEF6</i> | 1.6E-2    |    |    |
|  |            | <i>Y_RNA</i>   | 2.5E-11     | <i>SLC22A5</i> | 6.6E-06   |    |    |
|  |            |                |             | <i>SHROOM1</i> | 3.5E-2    |    |    |
|  |            |                |             | <i>RAD50</i>   | 5.5E-06   |    |    |
|  | rs6866467  | <i>SLC22A5</i> | 1.7E-52     | <i>RAPGEF6</i> | 1.6E-2    | na | na |
|  |            | <i>SLC22A4</i> | 3.0E-12     | <i>SLC22A5</i> | 3.0E-05   |    |    |
|  |            | <i>C5orf56</i> | 1.2E-11     | <i>SHROOM1</i> | 5.0E-2    |    |    |
|  |            | <i>Y_RNA</i>   | 2.1E-10     | <i>RAD50</i>   | 2.1E-06   |    |    |

|                                |                   |                               |                    |                                              |                              |               |         |
|--------------------------------|-------------------|-------------------------------|--------------------|----------------------------------------------|------------------------------|---------------|---------|
|                                |                   |                               |                    | <i>P4HA2</i>                                 | 1.0E-2                       |               |         |
| 21q22.3<br>( <i>ERG</i> )      | <b>rs9976326</b>  | na                            | na                 | <i>BRWD1</i>                                 | 2.8E-2                       | na            | na      |
|                                | rs55681902        | na                            | na                 | na                                           | na                           | na            | na      |
| 17q21.32<br>( <i>IGF2BP1</i> ) | <b>rs10853104</b> | <i>UBE2Z</i><br><i>ATP5G1</i> | 1.9E-53<br>8.0E-15 | <i>DLX4</i><br><i>UBE2Z</i><br><i>ATP5G1</i> | 8.2E-3<br>3.5E-05<br>1.8E-07 | <i>ATP5G1</i> | 7.5E-08 |
| 9q21.3<br>( <i>TLE1</i> )      | <b>rs76925697</b> | na                            | na                 | na                                           | na                           | na            | na      |
|                                | rs62579834        | na                            | na                 | na                                           | na                           | na            | na      |
|                                | rs62579836        | na                            | na                 | na                                           | na                           | na            | na      |
|                                | rs62579838        | na                            | na                 | na                                           | na                           | na            | na      |
|                                | rs62579841        | na                            | na                 | na                                           | na                           | na            | na      |
|                                | rs868524          | na                            | na                 | na                                           | na                           | na            | na      |

211

212 Date sources : CAGE<sup>8</sup>, MuTHER<sup>9</sup>, Blood<sup>10</sup>. Lead SNPs shown in bold.

213

214

215

216

217 **Supplementary Table 11: Predicted transcription factor disruption**

218

219 Chromosome 6p21.3 nearest gene *BAK1*

| SNP rsID        | ChIP-seq              | Predicted motif                                                                                                             | PhastCons | GERP |
|-----------------|-----------------------|-----------------------------------------------------------------------------------------------------------------------------|-----------|------|
| Ref Alt         | Blood Cells           | Disruption                                                                                                                  |           |      |
| rs210134        |                       | ETS1,HAND1,SMC3                                                                                                             | 0         | 3.6  |
| A G             |                       |                                                                                                                             |           |      |
| rs210142        | BRD4, MYC, TCF3, CTCF | <b>CEBP, EHF, ELF1, ELF5, ETS, ETV4, FOS, GATA2, GTF2I, UA3, RAR, SPI1, SPIB, SPZ1, STAT[1,3,4,5A,6], TCF12, TEAD2, WT1</b> | 0         | 1.43 |
| T C             |                       |                                                                                                                             |           |      |
| <u>rs210143</u> | CEBPB, CTCF           | <b>CEBPA, NFIC, SMAD3, TFCEP2, TLX1</b>                                                                                     | 0         | 1.43 |
| T C             |                       |                                                                                                                             |           |      |

220

221

222 Chromosome 5q31.1 nearest genes *IRF1, C5orf56*

| SNP rsID   | ChIP-seq                                                                     | Predicted motif                                                                                                                       | PhastCons | GERP  |
|------------|------------------------------------------------------------------------------|---------------------------------------------------------------------------------------------------------------------------------------|-----------|-------|
| Ref Alt    | Haematopoietic cells                                                         | Disruption                                                                                                                            |           |       |
| rs10059611 |                                                                              | DBP, <b>E2F1, ELF1</b>                                                                                                                | 0         | -1.55 |
| G T        |                                                                              |                                                                                                                                       |           |       |
| rs12655512 |                                                                              | FOXL1, HLTF, <b>SNAI2, ZEB1</b>                                                                                                       | 0         | 1.3   |
| C T        |                                                                              |                                                                                                                                       |           |       |
| rs12659708 |                                                                              | ATF3, CACD, CCNT2, CHD2, E2F1, GABPA, IRF1, KLF[4,5,7], MAX, MAZ, SP1, <b>RAR, SP[1..3], SREBF2, TBP, TEAD2, TP53, TP73, ZBTB33</b>   | 0         | -1.48 |
| A G        |                                                                              |                                                                                                                                       |           |       |
| rs2522043  | BRD4, EP300, JMJD1C, MED1, PBX1, PML, RUNX3, STAT4, TCF3, EBF1, IKZF1, RUNX1 | <b>HNF4A, RAD21, RAR, RHOXF1, SMC3, SNAI2, ZEB1</b>                                                                                   | 0         | 0.54  |
| T A        |                                                                              |                                                                                                                                       |           |       |
| rs2522044  | EBF1, IKZF1, RUNX1                                                           | <b>ATOH1, FOXH1, FOXO3, GATA[1..3,6], HMGA1, LMO2, MYB, MYBL2, MYF6, MYOD1, MYOG, ZEB1, NEUROD1, PTF1A, SOX10, SOX13, SOX3, SOX4,</b> | 0         | -0.34 |
| C T        |                                                                              |                                                                                                                                       |           |       |

|                  |                                                                                                                                                                                                                                                                                                                                                                                                                                                                |       |       |
|------------------|----------------------------------------------------------------------------------------------------------------------------------------------------------------------------------------------------------------------------------------------------------------------------------------------------------------------------------------------------------------------------------------------------------------------------------------------------------------|-------|-------|
|                  | SOX6, SRY, <b>TAL1, TCF12, TCF3, TCF4, TFAP4</b>                                                                                                                                                                                                                                                                                                                                                                                                               |       |       |
| rs2706387<br>C T | AP3, <b>ASCL2</b> , BRCA1, <b>FIGLA, FOXA1, MAFB</b> , MYB, MYBL2, <b>MYF5, MYOD1, MYOG</b> , ZEB1, <b>NHLH1, NR3C1, PTF1A</b> , RFX1, <b>SIN3A, SMC3, TAF1, TCF12, TCF3, TFAP4, TFCP2, TFCP2L1</b>                                                                                                                                                                                                                                                            | 0.006 | 2.38  |
| rs4475253<br>A G | <b>ARID5B</b> , ATF3, <b>BARX1, BSX, CRX, EN1, EVX1, EVX2, GATA[1..6], GSC2, GCS, GSX2, HMGA1, HMGN3, HOXB2, HOXB3, ISL1, LMO2, GATA1, NFE2L1, NFE2L1::MAFG, NKX6-2, PDX1, PITX1, POU2F1, SIX[1,2,3,4,6]</b>                                                                                                                                                                                                                                                   | 0.019 | 2.02  |
| rs4504381<br>T G | <b>DBP, EN1, FUBP1, HDAC2, HES1, HOXD10, NKX2-1, NKX3-2, TFAP2A</b>                                                                                                                                                                                                                                                                                                                                                                                            | 0     | 1.82  |
| rs6865438<br>T C | ELF1, FOS, IKZF2, MECP2, UA9, <b>NANOG, USF2, ZIC1, ZNF143, ZNF350</b>                                                                                                                                                                                                                                                                                                                                                                                         | 0     | -0.98 |
| rs6866467<br>A G | IKZF2, TAL1, <b>NKX2-5, ZNF263</b>                                                                                                                                                                                                                                                                                                                                                                                                                             | 0     | 0.04  |
| rs726923<br>C A  | <b>CEBPA, CEBPB, CEBP, ELF5, ETS1, ETS, FLI1, FOXL1, TEAD1, NFE2L1, POU5F1, STAT3, STAT, TEAD[1..4]</b>                                                                                                                                                                                                                                                                                                                                                        | 0     | -0.59 |
| rs7703230<br>G T | ALX1, ALX3, ARID3A, BARHL1, BARHL2, BARX1, BARX2, BSX, CEBPD, DLX[1..6], EMX1, EMX2, EN1, EN2, ESX1, EVX1, EVX2, <b>FOXC1, GBX1, GBX2, GSX1, GSX2, HESX1, HMGA1, HMX[1..3], HOXA[1,2,5,10,11], HOXB[2,3,5,8], HOXC10, HOXC11, HOXD[3,4,8,9], ISL1, ISL2, ISX, LBX2, LHX[3,4,8,9], LMX1A, LMX1B, MEOX2, MIXL1, MNX1, MSX1, MSX2, NANOG, NKX1-2, NKX2-1, NKX2-5, NKX6-1, NKX6-2, NOBOX, PAX4, PAX7, PDX1, PRRX1, PRRX2, RAX2, RAX, SHOX2, SHOX, SIX1, TEAD1,</b> | 0.288 | 2.82  |

| TP53, UNCX, VAX1, VENTX1, VSX1 |                                                                  |                                                                                                                                                                                                                                                                                                                                                                                                                                                                                                                                                                                                                               |           |       |
|--------------------------------|------------------------------------------------------------------|-------------------------------------------------------------------------------------------------------------------------------------------------------------------------------------------------------------------------------------------------------------------------------------------------------------------------------------------------------------------------------------------------------------------------------------------------------------------------------------------------------------------------------------------------------------------------------------------------------------------------------|-----------|-------|
| SNP rsID                       | ChIP-seq                                                         | Predicted motif                                                                                                                                                                                                                                                                                                                                                                                                                                                                                                                                                                                                               | PhastCons | GERP  |
| Ref Alt                        | Haematopoietic cells                                             | Disruption                                                                                                                                                                                                                                                                                                                                                                                                                                                                                                                                                                                                                    |           |       |
| rs7713818                      | CTCF                                                             | <b>ETS1</b> , HLTf, ZNF263, RXRA, STAT4, STAT6, <b>WT1</b> , <b>ZNF263</b>                                                                                                                                                                                                                                                                                                                                                                                                                                                                                                                                                    | 0         | -0.04 |
| rs886285                       |                                                                  | ISL1, <b>LMX1B</b> , <b>MEOX1</b> , <b>MNX1</b> , <b>NKX6-2</b> , <b>NKX6-3</b> , <b>POU4F3</b> , <b>POU6F1</b> , <b>POU6F2</b> , VENTX                                                                                                                                                                                                                                                                                                                                                                                                                                                                                       | 0.079     | 2.4   |
| rs2522055                      | BCL6, BRD4, IKZF1, TCF3                                          |                                                                                                                                                                                                                                                                                                                                                                                                                                                                                                                                                                                                                               | 0         | 0.53  |
| 223                            |                                                                  |                                                                                                                                                                                                                                                                                                                                                                                                                                                                                                                                                                                                                               |           |       |
| 224                            |                                                                  |                                                                                                                                                                                                                                                                                                                                                                                                                                                                                                                                                                                                                               |           |       |
| 225                            | Chromosome 21q22.2 nearest gene <i>ERG</i>                       |                                                                                                                                                                                                                                                                                                                                                                                                                                                                                                                                                                                                                               |           |       |
| rs55681902                     |                                                                  | <b>ALX1</b> , <b>ALX3</b> , <b>BSX</b> , <b>CEBP</b> , CRX, CTCF, DLX1, DLX2, DLX3, DLX4, <b>DLX5</b> , <b>DLX6</b> , <b>E2F1</b> , <b>EMX2</b> , <b>EN1</b> , <b>EN2</b> , <b>ESX1</b> , GATA[1..6], <b>GBX1</b> , <b>GBX2</b> , GFI1, <b>HESX1</b> , <b>HMGA1</b> , <b>HOXA5</b> , <b>HOXD4</b> , <b>ISX</b> , <b>LBX2</b> , <b>LHX2</b> , <b>LMX1B</b> , <b>MSX1</b> , <b>MSX2</b> , <b>NKX6-2</b> , <b>NOBOX</b> , <b>NOTO</b> , OTX1, OTX2, OTX, <b>PAX2</b> , <b>PAX4</b> , PITX1, <b>PRRX1</b> , <b>PRRX2</b> , RAD21, <b>RAX2</b> , <b>RAX</b> , <b>SHOX2</b> , <b>SHOX</b> , <b>UNCX</b> , <b>VSX1</b> , <b>VSX2</b> | 0         | 0.67  |
| rs9976326                      | EBF1, EP300, IKZF1, LEO1, MED1, NR3C1, PBX1, <u>RUNX1</u> , TCF3 | AFP, ARID3A, <b>BARHL1</b> , <b>BARHL2</b> , BARX1, BARX2, BSX, <b>CDX2</b> , <b>CEBPB</b> , <b>CEBP</b> , CRX, DLX3, EN2, EVX1, EVX2, <b>FOXC1</b> , GSX1, GSX2, <b>HMGA1</b> , HNF1A, HOXA11, HOXA2, HOXB2, HOXB3, HOXC10, HOXD3, HOXD9, ISL1, <b>ISL2</b> , LHX9, MYB, NANOG, NKX2-5, NKX6-1, <b>NKX6-2</b> , NOTO, <b>PAX2</b> , PDX1, POU2F1, <u>RUNX1</u> , <b>STAT1</b> , <b>TLX2</b> , VENTX                                                                                                                                                                                                                          | 0         | -2.5  |
| 226                            |                                                                  |                                                                                                                                                                                                                                                                                                                                                                                                                                                                                                                                                                                                                               |           |       |
| 227                            |                                                                  |                                                                                                                                                                                                                                                                                                                                                                                                                                                                                                                                                                                                                               |           |       |
| 228                            |                                                                  |                                                                                                                                                                                                                                                                                                                                                                                                                                                                                                                                                                                                                               |           |       |

229 Chromosome 17q21.3 nearest gene *IGF2BP1*

| SNP rsID       | ChIP-seq                                                                                                                   | Predicted motif                                                                                                                                            | PhastCons | GERP  |
|----------------|----------------------------------------------------------------------------------------------------------------------------|------------------------------------------------------------------------------------------------------------------------------------------------------------|-----------|-------|
| <b>Ref Alt</b> | Haematopoietic cells                                                                                                       | Disruption                                                                                                                                                 |           |       |
| rs10853104     | BCL6, BRD4, <u>CTCF</u> ,<br>CTCF, ERG, FLI1,<br>GATA1, KLF1, KMT2A,<br><u>NFE2</u> , RAD21, SMAD1,<br>STAG1, TCF3, TRIM28 | <u>CTCF</u> , <b>E2F1</b> , <b>ELF1</b> , <b>ESRRA</b> , HIC1,<br>MYF, NF1, SMAD3, <b>TCF12</b> ,<br><b>TEAD2</b> , TFCP2, <b>ZBTB7A</b> , ( <b>NEF2</b> ) | 0         | -2.56 |

230

231 Chromosome 9q21.3 nearest gene *TLE1*

| SNP rsID       | ChIP-seq             | Predicted motif                                                                                                                                                                                                                                                                                                                                                                                                                                                                                                                                                                                                                                                                                                                                                                                                                                                                                       | PhastCons | GERP   |
|----------------|----------------------|-------------------------------------------------------------------------------------------------------------------------------------------------------------------------------------------------------------------------------------------------------------------------------------------------------------------------------------------------------------------------------------------------------------------------------------------------------------------------------------------------------------------------------------------------------------------------------------------------------------------------------------------------------------------------------------------------------------------------------------------------------------------------------------------------------------------------------------------------------------------------------------------------------|-----------|--------|
| <b>Ref Alt</b> | Haematopoietic cells | Disruption                                                                                                                                                                                                                                                                                                                                                                                                                                                                                                                                                                                                                                                                                                                                                                                                                                                                                            |           |        |
| rs62579834     |                      | AR, EBOX, ENO1, HNF4A, <b>ITGB2</b> ,<br>LMO2, MITF, MYC::MAX, MYF6,<br>NR3C1, OLIG2, PGR ,TFE3, TFEC,<br>TFE, USF2, USF, <b>YY1</b>                                                                                                                                                                                                                                                                                                                                                                                                                                                                                                                                                                                                                                                                                                                                                                  | 0         | -0.25  |
| rs62579836     |                      | <b>IRF4</b> , KLF6, <b>MAZ</b> , MEIS3,<br><b>POLR3A</b> , SMAD                                                                                                                                                                                                                                                                                                                                                                                                                                                                                                                                                                                                                                                                                                                                                                                                                                       | 0.409     | -0.513 |
| rs62579838     |                      | <b>ALX[1,3]</b> , <b>ARID3A</b> , <b>BARHL1</b> ,<br><b>BARX[1,2]</b> , <b>BSX</b> , CEBP, <b>CRX</b> ,<br><b>DLX[1..6]</b> , <b>EMX[1,2]</b> , <b>EMX2</b> ,<br><b>EN[1,2]</b> , <b>ESX1</b> , <b>EVX[1,2]</b> ,<br>FOXA[1,2], FOXB1, FOXC1,<br>FOXD[1,3], FOXF2, FOXG1, FOXI1,<br><b>FOXP3</b> , <b>GBX[1,2]</b> , <b>GSX[1,2]</b> ,<br>HDAC2, <b>HESX1</b> , HLTF, <b>HMGA1</b> ,<br><b>HOXA[1,2]</b> , <b>HOXB[2,3,5]</b> ,<br><b>HOXC10</b> , <b>HOXD[3,4,8,9]</b> , <b>ISX</b> ,<br><b>LBX2</b> , LEF1, <b>LHX[2,4,9]</b><br><b>,LMX1[A,B]</b> , <b>MIXL1</b> , <b>MNX1</b> ,<br><b>MSX[1,2]</b> , <b>NKX2-5</b> , <b>NKX6-[1,2]</b> ,<br><b>NOBOX</b> , <b>NOTO</b> , <b>PAX[4,7]</b> , <b>PAX7</b> ,<br><b>PBX1</b> , <b>PDX1</b> , <b>POU3F2</b> , <b>PRRX[1,2]</b> ,<br><b>RAX2</b> , <b>RAX</b> , <b>SHOX</b> ,<br>SOX[2,4,10,11,15], TCF7, <b>TLX2</b> ,<br><b>UNCX</b> , <b>VSX[1,2]</b> | 0         | -3.39  |
| rs62579841     |                      | FOXN1, GMEB2, <b>HMGA1</b> , MYB,<br><b>PAX7</b> , <b>POU1F1</b> , <b>TEAD1</b> , ZEB1                                                                                                                                                                                                                                                                                                                                                                                                                                                                                                                                                                                                                                                                                                                                                                                                                | 0         | 2.27   |
| rs76925697     | BRD4, CREBBP, EP300, | BARHL1, BARHL2, CDX2, CPEB1,                                                                                                                                                                                                                                                                                                                                                                                                                                                                                                                                                                                                                                                                                                                                                                                                                                                                          | 0.278     | 0.00   |

|          |                                                                                                                                                          |                                                                                                                                                                                           |   |      |
|----------|----------------------------------------------------------------------------------------------------------------------------------------------------------|-------------------------------------------------------------------------------------------------------------------------------------------------------------------------------------------|---|------|
| A T      | ERG, FLI1, GATA2,<br>GATA3, IKZF1, KDM6A,<br>MED1 ,MYB, NFE2,<br>NOTCH1, PBX1, RUNX1<br>,SKI, SMAD1, SPI1,<br>TAL1, TCF12, TCF3,<br>TCF7L2, TLX1, TRIM28 | FOXC1, <b>HAND1</b> , HOXA11,<br>HOXD13 , <b>IRF[1..3,7,9]</b> ,<br><b>STAT[1,4,5A,6]</b> , <b>UBP1</b> , <b>ZNF384</b>                                                                   |   |      |
| rs868524 |                                                                                                                                                          | ATF4, CEBPA, CEBPB ,CEBPD,<br>CEBP, EP300, <b>MEIS3</b> , <b>CEBPB</b> ,<br><b>SMAD</b> , <b>SOX13</b> , <b>SOX17</b> , <b>SOX30</b> ,<br><b>SOX6</b> , <b>SOX9</b> , <b>SRY</b> , TFAP2A | 0 | -1.9 |
| G A      |                                                                                                                                                          |                                                                                                                                                                                           |   |      |

232

233 Description: transcription factor binding sites downloaded from ChIP-Atlas (<http://chip-atlas.org/>)  
234 filtering for cell lines with a haematopoietic lineage and a MACS peak Q value of greater than 100.  
235 Overlapping binding sites from the same ChIP target were merged. Predicted motif disruption was  
236 performed using MotifbreakR<sup>11</sup>, filtering for targets with a predicted strong effect and targets with a  
237 best matching allele score of >0.9 (max=1). Targets with ChIP peaks and predicted disrupted binding  
238 at a SNP are highlighted in brackets. NEF2 binding is predicted disrupted by rs10853104 with low  
239 effect but was included, in brackets, due to matched ChIP binding site. Proteins with a predicted  
240 greater affinity for the reference allele of a SNP are shown in bold. When multiple proteins from the  
241 same family are predicted to have their binding disrupted these have been abbreviated, for example  
242 STAT[1..3,5A,6] represents STAT, STAT1, STAT2, STAT5A and STAT6. PhastCons and GERP  
243 evolutionary conservation scores were extracted from UCSC datasets  
244 'phastConsElements46way.txt.gz' 'allHg19RS\_BW.txt.gz' respectively, all data based on Hg19  
245 build.

246

247



248 **Supplementary Table 12: Results from the SMR eQTL and mQTL analysis of the combined summary GWAS datasets.**  $P_{SMR}$  shows the significant summary  $P$  value from the  
249 analysis after filtering each dataset specific thresholds.  $P_{HEIDI}$  shows the heterogeneity associated with each probe-SNP analysis (value <0.05 indicates significant  
250 heterogeneity). Loci that pass the  $P_{SMR}$  threshold for each gene expression dataset combined with a  $P_{HEIDI} > 0.05$  are considered as regions in which risk alleles contribute to  
251 ALL risk by influencing gene expression in-cis. Columns show Tissue: The dataset used in the analysis; CHR: chromosome; Probe ID; Gene: gene symbol; Probe bp: probe  
252 position; SNP: rsID; SNP bp: SNP position; A1: effect allele; A2: alternate allele; Freq: allele frequency of A1;  $b_{GWAS}$ : Beta from GWAS; SE from GWAS;  $P$ -value from GWAS;  $b_{eQTL}$ :  
253 effect size from eQTL; SE from eQTL;  $P_{eQTL}$ :  $P$ -value from eQTL dataset;  $b_{xy}$ : effect size from SMR analysis; SE from SMR analysis;  $P$ -value from SMR analysis;  $P_{HEIDI}$ :  $P$ -value from HEIDI  
254 (Heterogeneity in Dependent Instruments); number of SNPs used in HEIDI test

| Tissue                               | CHR | Probe ID          | Gene    | Probe bp | SNP        | SNP bp   | A1 | A2 | Freq (A1) |
|--------------------------------------|-----|-------------------|---------|----------|------------|----------|----|----|-----------|
| Blood eQTL; Westra <i>et al</i>      | 10  | ILMN_2152465      | PIP4K2A | 22826096 | rs10764339 | 22867210 | T  | C  | 0.38      |
| Blood eQTL; GTEx                     | 6   | ENSG00000030110.8 | BAK1    | 33544174 | rs210143   | 33546930 | C  | T  | 0.71      |
| Lymphocyte eQTL; GTEx                | 6   | ENSG00000030110.8 | BAK1    | 33544174 | rs210134   | 33540209 | G  | A  | 0.69      |
| mQTL (Aberdeen); Hannon <i>et al</i> | 10  | cg13344587        | ARID5B  | 63723919 | rs7896246  | 63724390 | A  | G  | 0.34      |
| mQTL (Aberdeen); Hannon <i>et al</i> | 7   | cg01139861        | IKZF1   | 50343298 | rs11761922 | 50344132 | C  | G  | 0.31      |
| mQTL (Aberdeen); Hannon <i>et al</i> | 7   | cg14216940        | IKZF1   | 50343131 | rs11761922 | 50344132 | C  | G  | 0.31      |
| mQTL (Aberdeen); Hannon <i>et al</i> | 21  | cg27471246        | ERG     | 39776434 | rs9976326  | 39776485 | T  | A  | 0.24      |
| mQTL (UCL); Hannon <i>et al</i>      | 7   | cg14216940        | IKZF1   | 50343131 | rs6583437  | 50350267 | A  | G  | 0.38      |
| mQTL (UCL); Hannon <i>et al</i>      | 10  | cg20641026        | PIP4K2A | 22906638 | rs1750775  | 22938848 | C  | T  | 0.32      |
| mQTL (UCL); Hannon <i>et al</i>      | 12  | cg18954900        | ELK3    | 96604497 | rs12828252 | 96612094 | G  | A  | 0.30      |
| mQTL (UCL); Hannon <i>et al</i>      | 21  | cg27471246        | ERG     | 39776434 | rs2836364  | 39767874 | T  | C  | 0.25      |

  

| $b_{GWAS}$ | $SE_{GWAS}$ | $P_{GWAS}$              | $b_{eQTL}$ | $SE_{eQTL}$ | $P_{eQTL}$              | $b_{xy}$ | SE    | $P_{SMR}$              | $P_{HEIDI}$            | nSNP <sub>HET</sub> |
|------------|-------------|-------------------------|------------|-------------|-------------------------|----------|-------|------------------------|------------------------|---------------------|
| -0.170     | 0.027       | $2.89 \times 10^{-10}$  | -0.564     | 0.019       | $4.69 \times 10^{-202}$ | 0.302    | 0.049 | $6.71 \times 10^{-10}$ | $5.56 \times 10^{-02}$ | 19                  |
| 0.138      | 0.029       | $1.74 \times 10^{-06}$  | -0.624     | 0.038       | $2.01 \times 10^{-59}$  | -0.221   | 0.048 | $4.48 \times 10^{-06}$ | $6.32 \times 10^{-01}$ | 19                  |
| 0.131      | 0.028       | $4.17 \times 10^{-06}$  | -0.765     | 0.077       | $3.67 \times 10^{-23}$  | -0.171   | 0.041 | $2.99 \times 10^{-05}$ | $2.61 \times 10^{-01}$ | 19                  |
| 0.584      | 0.027       | $9.13 \times 10^{-106}$ | -0.040     | 0.002       | $2.01 \times 10^{-118}$ | -14.500  | 0.913 | $8.36 \times 10^{-57}$ | $8.98 \times 10^{-01}$ | 13                  |
| 0.208      | 0.028       | $2.14 \times 10^{-13}$  | 0.060      | 0.002       | $8.27 \times 10^{-160}$ | 3.489    | 0.493 | $1.43 \times 10^{-12}$ | $5.36 \times 10^{-02}$ | 19                  |
| 0.208      | 0.028       | $2.14 \times 10^{-13}$  | 0.049      | 0.002       | $1.01 \times 10^{-135}$ | 4.281    | 0.608 | $1.95 \times 10^{-12}$ | $7.40 \times 10^{-02}$ | 18                  |
| 0.171      | 0.030       | $1.11 \times 10^{-08}$  | -0.019     | 0.002       | $2.21 \times 10^{-26}$  | -8.889   | 1.767 | $4.86 \times 10^{-07}$ | $5.31 \times 10^{-02}$ | 10                  |
| 0.178      | 0.027       | $3.08 \times 10^{-11}$  | 0.037      | 0.003       | $1.36 \times 10^{-46}$  | 4.760    | 0.790 | $1.67 \times 10^{-09}$ | $2.76 \times 10^{-01}$ | 2                   |
| -0.168     | 0.028       | $2.02 \times 10^{-09}$  | 0.026      | 0.003       | $3.72 \times 10^{-15}$  | -6.428   | 1.348 | $1.86 \times 10^{-06}$ | $7.66 \times 10^{-02}$ | 7                   |
| 0.143      | 0.028       | $3.53 \times 10^{-07}$  | 0.027      | 0.003       | $1.93 \times 10^{-20}$  | 5.374    | 1.204 | $8.08 \times 10^{-06}$ | $3.26 \times 10^{-01}$ | 5                   |
| 0.153      | 0.029       | $1.56 \times 10^{-07}$  | -0.019     | 0.002       | $6.61 \times 10^{-16}$  | -8.127   | 1.848 | $1.09 \times 10^{-05}$ | $2.04 \times 10^{-01}$ | 6                   |

255 **Supplementary Table 13: Details of the datasets used for the SMR analysis detailing  $P_{SMR}$  and  $P_{HEIDI}$  thresholds.**

| <b>Study</b>                          | <b>Number of SMR tests</b> | <b><math>P_{SMR}</math> threshold</b> | <b>Genes passing <math>P_{SMR}</math> threshold</b> | <b>Genes passing <math>P_{HEIDI}</math> (&gt;0.05) threshold</b> |
|---------------------------------------|----------------------------|---------------------------------------|-----------------------------------------------------|------------------------------------------------------------------|
| Blood eQTL; Westra <i>et al</i>       | 5850                       | $< 8.5 \times 10^{-6}$                | 5                                                   | 1                                                                |
| Blood eQTL; GTEx                      | 4133                       | $< 1.2 \times 10^{-5}$                | 3                                                   | 1                                                                |
| EBV transformed Lymphocyte eQTL; GTEx | 1388                       | $< 3.6 \times 10^{-5}$                | 2                                                   | 1                                                                |
| mQTL (Aberdeen)                       | 41098                      | $< 1.2 \times 10^{-6}$                | 10                                                  | 0                                                                |
| mQTL (UCL)                            | 29926                      | $< 1.6 \times 10^{-6}$                | 6                                                   | 1                                                                |

256

257

258

259

260 **Supplementary Table 14: Heritability of childhood acute lymphoblastic leukaemia explained**  
261 **by genome-wide SNPs estimated using Linkage Disequilibrium Adjusted Kinship (LDAK)**  
262 **method.**

| <b>Total SNPs used</b> | <b>Heritability</b> | <b>Standard deviation</b> |
|------------------------|---------------------|---------------------------|
| 1,553,634              | 21%                 | 0.065                     |

263

264

265  
266  
267  
268  
269

**Supplementary Table 15: Individual variance in risk associated with the most significant SNPs from each risk loci associated with childhood ALL.**  
 CHR: Chromosome; RAF: risk allele frequency. \*New loci discovered in current meta-analyses. OR: Odds ratio; CI: confidence intervals. OR and CI are derived from current meta-analysis. CHR: chromosome; BP: base pair; % of total variance in risk to childhood ALL was tested under the following Standardised incidence ratios (SIR) of 3.2 (95% CI: 1.5-5.9) as per Kharazmi *et al.*

| CHR              | SNP (Subtype)                     | Locus (gene)                | Position (BP) | Risk Allele | RAF  | OR (95% CI)      | P-value                 | % of total variance in risk explained |
|------------------|-----------------------------------|-----------------------------|---------------|-------------|------|------------------|-------------------------|---------------------------------------|
| 2                | rs17481869( <i>ETV6-RUNX1</i> )   | 2q22.3                      | 146124454     | A           | 0.08 | 1.74 (1.45-2.09) | 2.37x10 <sup>-09</sup>  | 2.54                                  |
| 5                | *rs886285 (High-hyperdiploidy)    | 5q31.1 ( <i>C5orf56</i> )   | 131765206     | T           | 0.34 | 1.29 (1.18-1.41) | 1.56x10 <sup>-08</sup>  | 1.61                                  |
| 6                | *rs210143 (High-hyperdiploidy)    | 6p21.31 ( <i>BAK1</i> )     | 33546930      | C           | 0.73 | 1.30 (1.19-1.43) | 2.21x10 <sup>-08</sup>  | 1.55                                  |
| 7                | rs17133805                        | 7p12.2 ( <i>IKZF1</i> )     | 50477514      | G           | 0.32 | 1.65 (1.56-1.74) | 5.28x10 <sup>-71</sup>  | 6.10                                  |
| 8                | rs75777619                        | 8q24.21                     | 130185176     | G           | 0.12 | 1.26 (1.17-1.36) | 2.30x10 <sup>-09</sup>  | 0.62                                  |
| 9                | rs113650570                       | 9p21.3 ( <i>CDKN2A</i> )    | 21976402      | A           | 0.02 | 2.32 (2.03-2.65) | 8.06x10 <sup>-35</sup>  | 1.82                                  |
| 9                | *rs76925697                       | 9q21.31                     | 83747371      | A           | 0.96 | 1.52 (1.31-1.76) | 2.11x10 <sup>-08</sup>  | 0.75                                  |
| 10               | rs10821936                        | 10q21.2 ( <i>ARID5B</i> )   | 63723577      | C           | 0.33 | 1.80 (1.71-1.89) | 1.19x10 <sup>-106</sup> | 8.50                                  |
| 10               | rs3824662                         | 10p14 ( <i>GATA3</i> )      | 8104208       | A           | 0.19 | 1.29 (1.21-1.38) | 3.57x10 <sup>-14</sup>  | 1.11                                  |
| 10               | rs2296624                         | 10p12.2 ( <i>PIP4K2A</i> )  | 22856946      | C           | 0.67 | 1.25 (1.18-1.32) | 2.79x10 <sup>-15</sup>  | 1.19                                  |
| 10               | rs12779301                        | 10q26.13 ( <i>LHPP</i> )    | 126292655     | C           | 0.66 | 1.22 (1.15-1.29) | 5.72x10 <sup>-13</sup>  | 0.98                                  |
| 14               | rs2239630                         | 14q11.2 ( <i>CEBPE</i> )    | 23589349      | A           | 0.45 | 1.28 (1.22-1.35) | 1.72x10 <sup>-21</sup>  | 1.72                                  |
| 17               | *rs10853104 ( <i>ETV6-RUNX1</i> ) | 17q21.32 ( <i>IGF2BP1</i> ) | 47092076      | T           | 0.47 | 1.33 (1.21-1.47) | 1.82x10 <sup>-08</sup>  | 2.31                                  |
| 21               | rs9976326                         | 21q22.2 ( <i>ERG</i> )      | 39776485      | T           | 0.25 | 1.19 (1.12-1.26) | 1.11x10 <sup>-08</sup>  | 0.63                                  |
| <b>Overall %</b> |                                   |                             |               |             |      |                  |                         | <b>31.43%</b>                         |

270 **Supplementary Table 16: Conditional and joint analysis using summary statistics under a stepwise model (GCTA cojo analysis).** CHR:  
 271 chromosome; bp: base pair; refA: allele tested; freq: frequency; b: Beta; se: standard error; bj: joint analysis beta; bj\_se: joint analysis standard  
 272 error; LD correlation between SNP i and SNP i + 1 from SNPs on the list.

| CHR | SNP         | bp        | refA | freq | b     | se   | Meta P-value | n       | freq_genotype | bj    | bj_se | COJO P-value | LD    |
|-----|-------------|-----------|------|------|-------|------|--------------|---------|---------------|-------|-------|--------------|-------|
| 7   | rs17133805  | 50477514  | G    | 0.34 | 0.50  | 0.03 | 5.28E-71     | 20844.3 | 0.28          | 0.50  | 0.03  | 5.71E-70     | 0     |
| 8   | rs75777619  | 130185176 | G    | 0.14 | 0.23  | 0.04 | 2.30E-09     | 20776.8 | 0.12          | 0.23  | 0.04  | 2.37E-09     | 0     |
| 9   | rs113650570 | 21976402  | A    | 0.05 | 0.84  | 0.07 | 8.06E-35     | 18497.2 | 0.03          | 0.63  | 0.07  | 8.27E-18     | -0.15 |
| 9   | rs10811644  | 22025067  | T    | 0.44 | -0.19 | 0.03 | 8.66E-13     | 21993.4 | 0.46          | -2.23 | 0.07  | 4.20E-200    | 0.94  |
| 9   | rs10757266  | 22049555  | T    | 0.46 | 0.11  | 0.03 | 2.73E-05     | 22181.1 | 0.48          | 2.79  | 0.08  | 2.44E-273    | 0.66  |
| 9   | rs944800    | 22050898  | G    | 0.66 | -0.14 | 0.03 | 4.12E-07     | 21949   | 0.68          | -0.71 | 0.04  | 2.30E-63     | 0.19  |
| 9   | rs17694555  | 22051295  | G    | 0.11 | 0.40  | 0.04 | 9.52E-20     | 20385.9 | 0.08          | 0.78  | 0.06  | 3.31E-45     | 0     |
| 9   | rs76925697  | 83747371  | T    | 0.03 | -0.42 | 0.07 | 2.11E-08     | 24233.5 | 0.04          | -0.42 | 0.07  | 2.16E-08     | 0     |
| 10  | rs10821936  | 63723577  | T    | 0.59 | -0.59 | 0.03 | 1.19E-106    | 21186.2 | 0.66          | -0.59 | 0.03  | 2.48E-104    | 0     |
| 10  | rs3824662   | 8104208   | A    | 0.21 | 0.25  | 0.03 | 3.57E-14     | 20222.8 | 0.17          | 0.25  | 0.03  | 3.87E-14     | 0     |
| 10  | rs4335448   | 22359075  | G    | 0.76 | 0.20  | 0.03 | 6.05E-11     | 23252.5 | 0.75          | 0.18  | 0.03  | 1.42E-09     | 0     |
| 10  | rs74229974  | 22476221  | T    | 0.20 | -0.22 | 0.03 | 6.37E-12     | 23482.8 | 0.23          | -0.18 | 0.03  | 9.17E-09     | 0.16  |
| 10  | rs2296624   | 22856946  | T    | 0.31 | -0.22 | 0.03 | 2.79E-15     | 22650.7 | 0.34          | -0.18 | 0.03  | 1.34E-10     | 0     |
| 10  | rs12779301  | 126292655 | C    | 0.66 | 0.20  | 0.03 | 5.72E-13     | 22203.7 | 0.63          | 0.20  | 0.03  | 6.08E-13     | 0     |
| 21  | rs9976326   | 39776485  | T    | 0.27 | 0.17  | 0.03 | 1.11E-08     | 21262.2 | 0.24          | 0.17  | 0.03  | 6.55E-09     | -0.02 |
| 21  | rs9979478   | 39807498  | T    | 0.93 | 0.27  | 0.05 | 1.90E-08     | 23146.2 | 0.91          | 0.28  | 0.05  | 1.11E-08     | 0     |

273

274

275 References

- 276 1. Tian, L. *et al.* Long-read sequencing unveils IGH-DUX4 translocation into the silenced IGH  
277 allele in B-cell acute lymphoblastic leukemia. *Nat Commun* **10**, 2789 (2019).
- 278 2. Rao, S.S. *et al.* A 3D map of the human genome at kilobase resolution reveals principles of  
279 chromatin looping. *Cell* **159**, 1665-80 (2014).
- 280 3. Javierre, B.M. *et al.* Lineage-specific genome architecture links enhancers and non-coding  
281 disease variants to target gene promoters. *Cell* **167**, 1369-1384. e19 (2016).
- 282 4. Cairns, J. *et al.* CHiCAGO: robust detection of DNA looping interactions in Capture Hi-C data.  
283 *Genome Biol* **17**, 127 (2016).
- 284 5. Qian, M. *et al.* Whole-transcriptome sequencing identifies a distinct subtype of acute  
285 lymphoblastic leukemia with predominant genomic abnormalities of EP300 and CREBBP.  
286 *Genome Res* **27**, 185-195 (2017).
- 287 6. Alexander, D.H., Novembre, J. & Lange, K. Fast model-based estimation of ancestry in  
288 unrelated individuals. *Genome Res* **19**, 1655-64 (2009).
- 289 7. Perez-Andreu, V. *et al.* Inherited GATA3 variants are associated with Ph-like childhood acute  
290 lymphoblastic leukemia and risk of relapse. *Nat Genet* **45**, 1494-8 (2013).
- 291 8. Lloyd-Jones, L.R. *et al.* The Genetic Architecture of Gene Expression in Peripheral Blood. *Am J*  
292 *Hum Genet* **100**, 371 (2017).
- 293 9. Grundberg, E. *et al.* Mapping cis- and trans-regulatory effects across multiple tissues in  
294 twins. *Nat Genet* **44**, 1084-9 (2012).
- 295 10. Westra, H.J. *et al.* Systematic identification of trans eQTLs as putative drivers of known  
296 disease associations. *Nat Genet* **45**, 1238-1243 (2013).
- 297 11. Coetzee, S.G., Coetzee, G.A. & Hazelett, D.J. motifbreakR: an R/Bioconductor package for  
298 predicting variant effects at transcription factor binding sites. *Bioinformatics* **31**, 3847-9  
299 (2015).

300
